# Supplementary material for: Characterizing the Movement of Per- and Polyfluoroalkyl Substances in an Avian Aquatic–Terrestrial Food Web
Source: PubMed Central journal article supplement (PMC10702434; doi:10.1021/acs.est.3c06944), 2023-11-24
Supplement: es3c06944_si_001.pdf [file es3c06944_si_001.pdf]

## Supporting Information

### Characterizing the Movement of Per- and Polyfluoroalkyl Substances in an Avian Aquatic- Terrestrial Food Web

Kailee E. Hopkins<sup>1,2\*</sup>, Melissa A. McKinney<sup>2</sup>, Amandeep Saini<sup>3</sup>, Robert J. Letcher<sup>4</sup>, Natalie K.  
Karouna-Renier<sup>5</sup>, Kim J. Fernie<sup>1,2</sup>

<sup>1</sup>Ecotoxicology and Wildlife Health Division, Environment and Climate Change Canada, 867  
Lakeshore Road, Burlington, ON, L7R 4A6, Canada

<sup>2</sup>Department of Natural Resource Sciences, McGill University, 21111 Lakeshore Road, Sainte-  
Anne-de-Bellevue, QC, H9X 3V9, Canada

<sup>3</sup>Air Quality Processes Research Section, Environment and Climate Change Canada, 4905  
Dufferin Street, North York ON, M3H 5T4, Canada

<sup>4</sup>Ecotoxicology and Wildlife Health Division, Environment and Climate Change Canada,  
Carleton University, 1125 Colonel By Drive, Ottawa, ON, K1A 0H3, Canada

<sup>5</sup>U.S. Geological Survey, Eastern Ecological Science Center, Patuxent Research Refuge, 12302  
Beech Forest Road, Laurel, MD, 20708, United States

Pages: 36

Tables: 12

Figures: 1

**Any use of trade, product, or firm names is for descriptive purposes only and does not imply endorsement by the U.S. Government.**

## TABLE OF CONTENTS

|                                                     |    |
|-----------------------------------------------------|----|
| Materials and Methods .....                         | 5  |
| <i>Tree Swallow Tissue Collection</i> .....         | 5  |
| <i>Macroinvertebrate Collection</i> .....           | 5  |
| <i>Air, Water and Sediment Collection</i> .....     | 6  |
| <i>Stable Isotope and Fatty Acid analysis</i> ..... | 7  |
| <i>PFAS Analysis</i> .....                          | 8  |
| Results.....                                        | 9  |
| <i>PFAS Detection Frequencies</i> .....             | 9  |
| References.....                                     | 35 |

|                                                                                                                                                                                                                                                                                                                                                                                                                                                                                                                                  |    |
|----------------------------------------------------------------------------------------------------------------------------------------------------------------------------------------------------------------------------------------------------------------------------------------------------------------------------------------------------------------------------------------------------------------------------------------------------------------------------------------------------------------------------------|----|
| <b>Table S1-</b> Subclass, number of perfluorinated carbons, and acronym of 46 target per- and polyfluoroalkyl substances analyzed in environmental compartments (air, surface water, sediment, aquatic and terrestrial invertebrates, and tree swallow gastrointestinal tracts and livers). Compounds analyzed in air denoted by <sup>a</sup> , and compounds measured in surface water, sediment, aquatic and terrestrial invertebrates, and tree swallow gastrointestinal tracts and livers are denoted by <sup>b</sup> ..... | 11 |
| <b>Table S2</b> - Surrogate standards for perfluoroalkyl substance (PFAS) extraction and analysis in environmental samples collected from an aquatic-terrestrial food web in the Laurentian Great Lakes Basin in southwestern Ontario, Canada. See Table S1 for full PFAS names. ...                                                                                                                                                                                                                                             | 12 |
| <b>Table S3</b> - Detection frequencies (%) of perfluorocarboxylic acids (PFCAs), perfluorosulfonic acids (PFSAs), and) precursors sampled in air, surface water, sediment, aquatic invertebrates, terrestrial invertebrates, and tree swallow nestling GI tracts and livers near a wastewater treatment plant site in southwestern Ontario, Canada (See Figure 1). Congeners not analyzed within a given compartment are denoted with an X. See Table S2 for full PFAS chemical names. ....                                     | 13 |
| <b>Table S4-</b> Instrument limit of detection (IDL) in air samples and minimum limit of detection (MLOD) in surface water, sediment, aquatic invertebrates, terrestrial invertebrates, and tree swallow nestling gastrointestinal tracts (GI tracts) and livers for 46 per- and polyfluoroalkyl substances. Congeners not analyzed within a given compartment are denoted with an X See Table S1 for full PFAS names. ....                                                                                                      | 14 |
| <b>Table S5</b> - Perfluoroalkyl substances (PFAS) that were detected in $\geq 60\%$ of samples and therefore included in subsequent statistical analyses. Checks indicate congeners $\geq 60\%$ detection frequency in the respective compartment, NA indicates $\leq 60\%$ detection frequency, or the congener wasn't analyzed.....                                                                                                                                                                                           | 15 |
| <b>Table S6</b> - A comparison of five dietary fatty acids from aquatic invertebrates (AI), terrestrial invertebrates (TI), and tissues of tree swallow nestlings (i.e., livers, carcasses). Means $\pm$ SEMs are presented, along with the results of Pearson/Spearman's correlations of fatty acids with the principal components generated by the principal component analysis (PCA) of FA proportions of these biota. See Fig. 2 for PCA biplot. ....                                                                        | 16 |
| <b>Table S7</b> - Comparisons of perfluoroalkyl substance (PFAS) concentrations among abiotic and biotic compartments of a tree swallow food web. PFAS concentrations of terrestrial insects                                                                                                                                                                                                                                                                                                                                     |    |

were excluded from these statistical comparisons except for PFOS and 6:2 FTS, since the remaining PFAS congeners were undetected (Table S4). Surface water (water), sediment (S), aquatic invertebrates (AI), terrestrial invertebrates (TI), nestling gastrointestinal tracts (GIT), nestling livers. See Table S1 for full PFAS names. ....17

**Table S8** – Standard deviations of calculated bioaccumulation factors (BAFs) and biomagnification factors (BMFs) for per- and polyfluoroalkyl substances (PFAS) in abiotic and biotic compartments of a tree swallow food web in southwestern Ontario in 2021. Nestling samples involved their gastrointestinal tract and livers. ....18

**Table S9** – Correlations of the first two dimensions of a multiple factor analysis (MFA) with the concentrations of individual PFAS congeners and precursors measured in abiotic (i.e., air, surface water, sediment) and biotic (i.e., aquatic and terrestrial macroinvertebrates, tree swallow nestling gastrointestinal tracts and livers) samples collected from an aquatic-terrestrial food web in southwestern Ontario. See Fig. 4 for the MFA variables and statistical results. ....19

**Table S10** – Values of stable carbon ( $\delta^{13}\text{C}$ ) and nitrogen ( $\delta^{15}\text{N}$ ) isotopes for all tree swallow nestling breast muscle samples collected in 2021 from an aquatic-terrestrial ecosystem in southwestern Ontario. ....21

**Table S11** – Proportions of individual fatty acids relative to the sum of the 66 fatty acids quantified in aquatic invertebrate, terrestrial invertebrate, and tree swallow liver and carcass samples collected in 2021 from an aquatic-terrestrial food web in southwestern Ontario. ....22

**Table S12** - Concentrations (ng/g in air, ng/mL in surface water and rinsate, ng/g dw in sediment, and ng/g ww in biota samples) of 46 per- and polyfluoroalkyl substances identified in passive air, surface water, sediment, aquatic invertebrates, terrestrial invertebrates, and tree swallow GI-Tracts and livers collected from an aquatic-terrestrial food web. ....30

**Fig. S1** - Profiles of five selected dietary fatty acid (FA) proportions (% of  $\sum\text{FA}$  proportions) measured in aquatic invertebrates and terrestrial invertebrates, and in tree swallow nestling livers and carcasses. Letters denote significant differences in proportions between sample types (all  $p \leq 0.05$ ). Only the major dietary FAs, those with proportions greater than 0.1 % were examined, and we selected the top 5 major FAs in the tree swallow nestling carcass for statistical analysis. ....20

## Materials and Methods

### *Tree Swallow Tissue Collection*

Reproductive monitoring was conducted during the breeding season, April through June, to determine a reproductive timeline (e.g., clutch initiation date, incubation start date, and estimated hatching date). Fifteen chicks were randomly selected from fifteen randomly chosen nest boxes at ten days of age. Once collected, tissues were dissected out within the shortest period possible (i.e., 3 days). Measurements of body morphometrics were completed, including weight (g), wing chord length (mm), and ninth primary length (mm) before euthanasia. Following decapitation, breast tissue (0.53 – 1.39 g) was collected from the chicks for stable isotope analysis ( $n = 15$ ). Livers were dissected from chicks and divided into aliquots for the analysis of PFAA concentrations ( $n = 15$ ) and FA signatures ( $n = 12$ ). The entire GI tract, from esophagus to cloacal vent, was removed and collected for PFAAs analysis ( $n = 15$ ), and the remaining carcass was kept for FA analysis ( $n = 15$ ). All tissues were briefly flash frozen in liquid nitrogen and stored at  $-80^{\circ}\text{C}$  until analysis. Samples were shipped frozen to SGS AXYS Analytical (Sidney, British Columbia, Canada) for PFAS analysis (livers, GI tracts), to Ján Veizer Stable Isotope Laboratory (formerly known as G.G. Hatch Laboratory, Ottawa University) (Ottawa, Ontario Canada) for stable isotope preparation and analysis (breast muscle), to McGill University (Sainte-Anne-de-Bellevue, Quebec, Canada) for FA signature analysis (remaining liver aliquot, whole carcasses).

### *Macroinvertebrate Collection*

Aquatic macroinvertebrates were collected from Red Hill Creek, Hamilton, Ontario, approximately 250 m directly downstream from the tree swallow breeding colony, using Hester-Dendy round 14-plate samplers (Dynamic Aqua) with adapted methods<sup>1,2,3</sup>. Traps were placed in pairs at three different locations, approximately 50 meters apart, between 250 m and 450 m downstream of the tree swallow colony (Fig. 1) and deployed for 4 weeks overlapping tree swallow nestling development. Traps were secured to the downstream side of cinder blocks to allow for water flow. Cinder blocks were placed on top of the sediment in the stream, approximately 2 m deep, and secured with rope to a nearby tree. Upon collection, traps were rinsed with creek water and all macroinvertebrate samples were pooled. The creek water rinsate

( $n = 2$ ) was collected for QA/QC PFAS analysis. Aquatic invertebrate samples were then weighed and divided into separate aliquots for analysis of PFAS (4.5 g/sample) ( $n = 5$ ) and FAs (2.5 g/sample) ( $n = 5$ ).

Terrestrial macroinvertebrates were collected within the colony and in the area surrounding the colony ( $\sim 8000 \text{ m}^2$ ) where tree swallows were observed feeding (Fig. 1). Sampling occurred daily for two weeks in May and June, parallel with the development of the sampled tree swallow chicks to accurately reflect diet. Sweep nets were used to collect macroinvertebrates by sweeping through the long grasses in the sampling area, and sweeping surveys were conducted by one individual, once a day for 0.5-1 hr. Samples were frozen at  $-20 \text{ }^\circ\text{C}$  for 24 hours, then sorted to remove all non-target species and vegetation, and pooled. Samples were weighed and divided into aliquots for PFAS analysis (4.5 g/sample) ( $n = 5$ ), and fatty acids (2.5 g/sample) ( $n = 5$ ). Aquatic and terrestrial invertebrate samples for perfluorinated analysis were stored at  $-20 \text{ }^\circ\text{C}$ , and for FAs analysis were stored at  $-80 \text{ }^\circ\text{C}$  until analysis.

#### *Air, Water and Sediment Collection*

Five sorbent-impregnated polyurethane foam air samplers (SIP-PFAS) in double-dome housing were deployed within the tree swallow colony to passively sample air contaminants for a 50-day period overlapping tree swallow breeding and nestling development. Four SIP-PAS were placed at the four directional corners of the colony and the fifth at the center of the colony (Fig. 1). SIP-PAS field blanks ( $n = 2$ ) were collected during the deployment of the five SIP-PAS. Procedures for sample disk preparation and deployment closely followed procedures previously outlined<sup>33</sup>. SIP-PAS s were deployed at a height of  $\sim 1.5 \text{ m}$  above ground level in the tree swallow colony. SIP-PAS s were removed from housing and placed in amber glass jars. Samples and blanks were stored at ambient room temperature until extraction and analysis.

Surface water samples were collected 5-d post tree swallow tissue collection in June 2021, directly from the wastewater effluent outflow, located approximately 250 m upstream from the colony (Fig. 1). High density polyethylene (HDPE) sample bottles were pre-rinsed with creek water, and samples (500 mL;  $n = 6$ ) were collected from the top 8-10 cm of the water column. Samples were stored at  $-20 \text{ }^\circ\text{C}$  until analysis.

Surficial sediment samples were also collected 5-d post tree swallow tissue collection in June 2021. We sampled for surficial sediments within 3-5 m downstream of each Hester-Dendy

trap (Fig. 1) to avoid disturbance and contamination of the HD traps, but to ensure the sample was representative of epi-benthic macroinvertebrate habitat. Sample bottles were rinsed with Red Hill Creek water and emptied downstream of sampling location. Sediment from the top 6 cm of the creek bed was sampled. Two sediment samples were collected per sampling location. Sediment samples (5 g) ( $n = 6$ ) were stored at  $-20\text{ }^{\circ}\text{C}$  until analysis.

#### *Stable Isotope and Fatty Acid analysis*

Methods for stable isotope extraction and instrumental analysis were completed by the Ján Veizer Stable Isotope Laboratory (University of Ottawa), and have been previously described<sup>4,5</sup>. Briefly, lipid-extracted, homogenized, freeze-dried tree swallow breast muscle samples were weighed into tin capsules and loaded into an elemental analyzer. Samples were flash combusted and analyzed on a coupled isotope ratio mass spectrometer (IRMS; Delta Advantage by Thermo, Germany). An in-house quality control Double Crested Cormorant (2003) was analyzed with each set of samples, and their results were within an acceptable 3% relative percent difference.

For fatty acid analysis, lipids were extracted from tree swallow livers using procedures previously established and documented<sup>6,7</sup>. Liver samples (0.11 – 0.40 g) were homogenized in a solution of 2:1 chloroform:methanol containing 0.01 % butylated hydroxytoluene (BHT v/v/w). A solution of 0.9 % sodium chloride was added to the sample. Samples were vortexed and left overnight at  $4\text{ }^{\circ}\text{C}$ . Samples were then centrifuged, and the bottom chloroform layer was isolated, filtered through anhydrous sodium sulfate, and the solvent was evaporated with nitrogen to obtain the extracted lipids. Methylene chloride with 0.01 % BHT and Hilditch reagent was then added to the samples which were then heated at  $100\text{ }^{\circ}\text{C}$  for 1 hr to *trans*-esterify the FAs to their fatty acid methyl ester (FAME) analogues. FAMEs were reconstituted with hexane to a final concentration of 50 mg total FAME  $\text{ml}^{-1}$  hexane. Samples were analyzed on an Agilent 8860 gas chromatograph (GC: Agilent Technologies, Santa Clara, CA, USA) with a flame ionization detector. The inlet was used in split mode, except for samples  $< 1\text{ mg FAME}$ , which were instead diluted to 0.5 mg/ml FAME  $\text{ml}^{-1}$  hexane and run-in splitless mode. A total of 66 individual FAs<sup>8</sup> were quantified as mass percent (%) of total FAME.

Whole carcass (1.50 – 1.85 g) and macroinvertebrate (0.72 – 1.63 g) samples were analyzed similarly to liver samples, except for preparation. Samples were homogenized in a

solution of 2:1 chloroform:methanol containing 0.01 % butylated hydroxytoluene (BHT v/v/w) to prevent oxidation and left overnight at 4 °C. Samples were then filtered to remove homogenate and rinsed with chloroform before centrifuging. Duplicates were extracted and analyzed for all carcasses ( $n = 15$ ), aquatic macroinvertebrates ( $n = 5$ ), and terrestrial macroinvertebrates ( $n = 4$ ). The relative percent difference for the duplicates averaged 14 % in carcasses, 11 % in aquatic macroinvertebrates, and 21 % in terrestrial macroinvertebrates. A standard reference material (Krill RM 8037) was run concurrently, and results were within 13 % of known values.

### *PFAS Analysis*

Air SIP-PAS samples ( $n = 7$ ) were analyzed by the Air Quality Processes and Research Section of ECCC (Toronto, Ontario). Methods for extraction and the instrumental analysis of samples has been previously described<sup>8</sup>. Briefly, accelerated solvent extraction was performed on each SIP-PAS disk to collect two fractions of extracts. SIP-PAS s were spiked with internal standards (25 ng for volatile n-PFAS, 0.5 ng for ionizable PFAS; Table S2) prior to extraction. The first fraction of extracts, containing ionizable PFAS was extracted with acetonitrile (3 cycles), and the second fraction, containing volatile n-PFAS, was extracted using petroleum ether/acetone (85/15, v/v; 3 cycles). Ionizable PFAS were reduced to 0.5 mL using TurboVap (Biotage, Charlotte, NC) and nitrogen blowdown, followed by carbon column clean up with ENVI-Carb (100 mg; 100-400 mesh), volatile n-PFAS were reduced to 0.5 mL using rotary evaporation and nitrogen blowdown. Ionizable PFAS were washed with acetonitrile and reduced to 0.5 mL. Samples were spiked with injection standards prior to instrument analysis.

Analysis and detection of volatile n-PFAS was performed using ultra performance liquid chromatography coupled with tandem mass spectrometer (UPLC-MS/MS; Waters'). Ionizable PFAS were analyzed using gas chromatography and single quadrupole mass spectrometry (GC/MS; Agilent). Mass of target analytes in the samples were converted to corresponding air concentrations using the effective air volume ( $V_{eq}$ ) sampled by SIPs.  $V_{eq}$  was determined using the GAPS template using the average temperature during the deployment period and octanol-air partition coefficients for each target chemical. Standard recoveries for ionizable PFAS were within 55 – 90 %, and for volatile n-PFAS 70 – 135 %.



Extraction and instrumental analysis of water ( $n = 6$ ), sediment ( $n = 6$ ), aquatic macroinvertebrates ( $n = 5$ ), terrestrial macroinvertebrates ( $n = 5$ ), tree swallow GI tracts ( $n = 15$ ), and livers ( $n = 15$ ), was completed by SGS AXYS Analytical (Sidney, British Columbia, Canada) using EPA Method 1633 (SGS AXYS MLA-110) and has previously been described<sup>36</sup>. Extraction procedures differed slightly based on media.

Water samples were spiked with surrogate standards (Table S2) and extraction by solid phase extraction (SPE) using weak anion exchange cartridges. Sample extracts are then treated with carbon powder and spiked with recovery standards before analysis.

Sediment, macroinvertebrate, and tree swallow tissue samples were spiked with isotopically labelled surrogate standards, followed by extraction with methanolic ammonium hydroxide solution to collect supernatants. Supernatants are combined and samples are treated with ultra-pure carbon powder and evaporated. Samples are cleaned by SPE using cartridges containing a weak anion exchange sorbent. Samples were then spiked with recovery standards before analysis.

Identification and quantification of 46 PFAS (see Table S1 for full chemical names) was performed on an ultrahigh performance liquid chromatography (UPLC-MS/MS) reversed phase C18 column using a solvent gradient, using electrospray ionization in negative ionization mode and in multiple reaction monitoring mode. Surrogate standard recoveries ranged from 48-166 %. Minimum detection limits for all PFAS analyzed in all compartments is presented in Table S3.

## **Results**

### *PFAS Detection Frequencies*

Detection rates of PFAS congeners varied greatly between the environmental compartments sampled (Table 1). Detection frequencies in air samples and surface water samples of the C<sub>4</sub>-C<sub>10</sub> PFCAs (PFBA, PFPeA, PFHxA, PFHpA, PFOA, PFNA, and PFDA) were 100 %, but ranged from not detected to 100 % detected in the sediment, invertebrate and tree swallow samples. The latter samples showed high detections for the longer-chain C<sub>12</sub>-C<sub>14</sub> PFCAs (PFDoA, PFTrDA, and PFTeDA), but these compounds were not detected in air or surface water. All seven compartments had PFOS detection rates of 100 %. Sediment, aquatic invertebrates, and tree swallow GI tracts showed 100 % detection of PFDS, but all other long-chain C<sub>9</sub>-C<sub>12</sub> PFASs (PFNS, PFDS, and PFDoS) were generally not detected in any samples.

Sediment, aquatic invertebrates, and both tree swallow tissues had detectable concentrations of 5:3 FTCA and, in both tree swallow tissues, 7:3 FTCA was also consistently detected. The perfluorooctane sulfonamidoacetic acids, N-MeFOSAA and N-EtFOSAA, were 100 % detected for all compartments, except that they were not analyzed in air samples. Air samples had detectable concentrations of the perfluorooctane sulfonamide ethanols, N-MeFOSE, and N-EtFOSE, which were much more variable in all other environmental compartments. For the terrestrial invertebrate samples, the precursor 6:2 FTS was the only PFAS congener detected. The per- and polyfluoroether carboxylates and ether sulfonates were not detected in any compartments, except for limited detection of 9Cl-PF3ONS in aquatic invertebrates.

**Table S1-** Subclass, number of perfluorinated carbons, and acronym of 46 target per- and polyfluoroalkyl substances analyzed in environmental compartments (air, surface water, sediment, aquatic and terrestrial invertebrates, and tree swallow gastrointestinal tracts and livers). Compounds analyzed in air denoted by <sup>a</sup>, and compounds measured in surface water, sediment, aquatic and terrestrial invertebrates, and tree swallow gastrointestinal tracts and livers are denoted by <sup>b</sup>.

| Subclass                                | Target Compound                                     | Number of Perfluorinated Carbons | Acronym      |
|-----------------------------------------|-----------------------------------------------------|----------------------------------|--------------|
| Perfluorocarboxylic acids               | Perfluoro-n-butanoic acid                           | C <sub>4</sub>                   | PFBA         |
|                                         | Perfluoro-n-pentanoic acid                          | C <sub>5</sub>                   | PFPeA        |
|                                         | Perfluoro-n-hexanoic acid                           | C <sub>6</sub>                   | PFHxA        |
|                                         | Perfluoro-n-heptanoic acid                          | C <sub>7</sub>                   | PFHpA        |
|                                         | Perfluoro-n-octanoic acid                           | C <sub>8</sub>                   | PFOA         |
|                                         | Perfluoro-n-nonanoic acid                           | C <sub>9</sub>                   | PFNA         |
|                                         | Perfluoro-n-decanoic acid                           | C <sub>10</sub>                  | PFDA         |
|                                         | Perfluoro-n-undecanoic acid                         | C <sub>11</sub>                  | PFUnA        |
|                                         | Perfluoro-n-dodecanoic acid                         | C <sub>12</sub>                  | PFDoA        |
|                                         | Perfluoro-n-tridecanoic acid                        | C <sub>13</sub>                  | PFTTrDA      |
|                                         | Perfluoro-n-tetradecanoic acid                      | C <sub>14</sub>                  | PFTeDA       |
|                                         | Perfluoro-n-hexadecanoic acid                       | C <sub>16</sub>                  | PFHxDA       |
|                                         | Perfluoro-n-octadecanoic acid                       | C <sub>18</sub>                  | PFODA        |
| Perfluorosulfonic acids                 | Perfluoro-1-n-butane sulfonic acid                  | C <sub>4</sub>                   | PFBS         |
|                                         | Perfluoro-1-pentane sulfonic acid                   | C <sub>5</sub>                   | PFPeS        |
|                                         | Perfluoro-1-hexane sulfonic acid                    | C <sub>6</sub>                   | PFHxS        |
|                                         | Perfluoro-1-heptane sulfonic acid                   | C <sub>7</sub>                   | PFHpS        |
|                                         | Perfluoro-1-octane sulfonic acid                    | C <sub>8</sub>                   | PFOS         |
|                                         | Perfluoro-n-onane sulfonic acid                     | C <sub>9</sub>                   | PFNS         |
|                                         | Perfluoro-n-decane sulfonic acid                    | C <sub>10</sub>                  | PFDS         |
|                                         | Perfluoro-n-dodecane sulfonic acid                  | C <sub>12</sub>                  | PFDoS        |
| Fluorotelomer sulfonates                | 1H, 1H, 2H, 2H-perfluorohexane sulfonic acid        | C <sub>4</sub>                   | 4:2 FTS      |
|                                         | 1H, 1H, 2H, 2H-perfluorooctane sulfonic acid        | C <sub>6</sub>                   | 6:2 FTS      |
|                                         | 1H, 1H, 2H, 2H-perfluorodecane sulfonic acid        | C <sub>8</sub>                   | 8:2 FTS      |
|                                         | 1H, 1H, 2H, 2H-perfluorododecane sulfonic acid      | C <sub>10</sub>                  | 10:2 FTS     |
| Fluorotelomer alcohols                  | 1H, 1H, 2H, 2H-perfluoro-1-octanol                  | C <sub>6</sub>                   | 6:2 FTOH     |
|                                         | 1H, 1H, 2H, 2H-perfluoro-1-decanol                  | C <sub>8</sub>                   | 8:2 FTOH     |
|                                         | 1H, 1H, 2H, 2H-perfluoro-1-dodecanol                | C <sub>10</sub>                  | 10:2 FTOH    |
| Fluorotelomer carboxylates              | 2H, 2H, 3H, 3H-perfluorohexanoic acid               | C <sub>3</sub>                   | 3:3 FTCA     |
|                                         | 2H, 2H, 3H, 3H-perfluorooctanoic acid               | C <sub>5</sub>                   | 5:3 FTCA     |
|                                         | 2H, 2H, 3H, 3H-perfluorodecanoic acid               | C <sub>7</sub>                   | 7:3 FTCA     |
| Perfluorooctane sulfonamides            | Perfluoro-1-octane sulfonamide                      | C <sub>8</sub>                   | PFOSA        |
|                                         | N-Methyl-perfluoro-octane sulfonamide               | C <sub>8</sub>                   | N-MeFOSA     |
|                                         | N-Ethyl-perfluoro-octane sulfonamide                | C <sub>8</sub>                   | N-EtFOSA     |
| Perfluorooctane sulfonamidoacetic acids | N-Methylperfluoro-1-octanesulfonamidoacetic acid    | C <sub>8</sub>                   | N-MeFOSAA    |
|                                         | N-Ethylperfluoro-1-octanesulfonamidoacetic acid     | C <sub>8</sub>                   | N-EtFOSAA    |
| Perfluorooctane sulfonamide ethanols    | N-Methylperfluoro-1-octanesulfonamidoacetic acid    | C <sub>8</sub>                   | N-MeFOSE     |
|                                         | N-Ethyl-perfluoro-octane sulfonamidoethanol         | C <sub>8</sub>                   | N-EtFOSE     |
| Per- and polyfluoroether carboxylates   | Hexafluoropropylene ide-dimer acid                  | C <sub>5</sub>                   | HFPO-DA      |
|                                         | Decafluoro-3H-4,8-dioxanonoate                      | C <sub>5</sub>                   | ADONA        |
|                                         | Perfluoro-3,6-dioxanonoate                          | C <sub>4</sub>                   | NFDHA        |
|                                         | Perfluoro-3-methoxypropanoate                       | C <sub>3</sub>                   | PFMPA        |
|                                         | Perfluoro-4-methoxybutanoate                        | C <sub>4</sub>                   | PFMBA        |
| Ether sulfonates                        | 9-chlorohexadecafluoro-3-oxanonane-1-sulfonic acid  | C <sub>8</sub>                   | 9CI-PF3ONS   |
|                                         | 11-chloroeicosafluoro-3-oxaundecane-1-sulfonic acid | C <sub>10</sub>                  | 11CI-PF3OUdS |
|                                         | Perfluoro (2-ethoxyethane) sulfonic acid            | C <sub>4</sub>                   | PFEESA       |

**Table S2** - Surrogate standards for perfluoroalkyl substance (PFAS) extraction and analysis in environmental samples collected from an aquatic-terrestrial food web in the Laurentian Great Lakes Basin in southwestern Ontario, Canada. See Table S1 for full PFAS names.

| Target Compound                                                  | Surrogate Standard      |
|------------------------------------------------------------------|-------------------------|
| Air                                                              |                         |
| PFBA                                                             | 13C4-PFBA               |
| PFH <sub>x</sub> A                                               | 13C2-PFH <sub>x</sub> A |
| PFH <sub>x</sub> S                                               | 18O2-PFH <sub>x</sub> S |
| PFNA                                                             | 13C5-PFNA               |
| PFOA                                                             | 13C4-PFOA               |
| PFOS                                                             | 13C4-PFOS               |
| PFDA                                                             | 13C2-PFDA               |
| PFUDA                                                            | 13C2-PFUDA              |
| PFD <sub>o</sub> A                                               | 13C2-PFD <sub>o</sub> A |
| 6:2 FTOH                                                         | M6:2 FTOH               |
| 8:2 FTOH                                                         | M8:2 FTOH               |
| 10:2 FTOH                                                        | M10:2 FTOH              |
| EtFOSA                                                           | D5-N-EtFOSA             |
| MeFOSA                                                           | D3-N-MeFOSA             |
| MeFOSE                                                           | D7-N-MeFOSE             |
| EtFOSE                                                           | D9-N-EtFOSE             |
| Surface Water, Sediment, Invertebrates, and Tree Swallow Tissues |                         |
| PFBA                                                             | 13C4-PFBA               |
| PFPeA                                                            | 13C5-PFPeA              |
| PFH <sub>x</sub> A                                               | 13C5-PFH <sub>x</sub> A |
| PFHpA                                                            | 13C4-PFHpa              |
| PFOA                                                             | 13C8-PFOA               |
| PFNA                                                             | 13C9-PFNA               |
| PFDA                                                             | 13C6-PFDA               |
| PFUnA                                                            | 13C7-PFUnA              |
| PFD <sub>o</sub> A                                               | 13C2-PFD <sub>o</sub> A |
| PFTeDA                                                           | 13C2-PFTeDA             |
| PFBS                                                             | 13C3-PFBS               |
| PFH <sub>x</sub> S                                               | 13C3-PFH <sub>x</sub> S |
| PFOS                                                             | 13C8-PFOS               |
| 4:2 FTS                                                          | 13C2-4:2 FTS            |
| 6:2 FTS                                                          | 13C2-6:2 FTS            |
| 8:2 FTS                                                          | 13C2-8:2 FTS            |
| PFOSA                                                            | 13C8-PFOSA              |
| MeFOSA                                                           | D3-N-MeFOSA             |
| EtFOSA                                                           | D5-N-EtFOSA             |
| MeFOSA                                                           | D3-N-MeFOSA             |
| EtFOSA                                                           | D5-N-EtFOSA             |
| MeFOSAA                                                          | D3-N-MeFOSAA            |
| EtFOSAA                                                          | D5-N-EtFOSAA            |
| MeFOSE                                                           | D7-N-MeFOSE             |
| EtFOSE                                                           | D9-N-EtFOSE             |
| HFPO-DA                                                          | 13C3-HFPO-DA            |

**Table S3** - Detection frequencies (%) of perfluorocarboxylic acids (PFCAs), perfluorosulfonic acids (PFSAs), and precursors sampled in air, surface water, sediment, aquatic invertebrates, terrestrial invertebrates, and tree swallow nestling GI tracts and livers near a wastewater treatment plant site in southwestern Ontario, Canada (See Figure 1). Congeners not analyzed within a given compartment are denoted with an X. See Table S2 for full PFAS chemical names.

| Subclass                                | Acronym      | Detection frequency (%) |                                 |                                |                                 |                                 |                                    |                                      |
|-----------------------------------------|--------------|-------------------------|---------------------------------|--------------------------------|---------------------------------|---------------------------------|------------------------------------|--------------------------------------|
|                                         |              | Air<br><i>n</i> = 5     | SW <sup>a</sup><br><i>n</i> = 6 | S <sup>a</sup><br><i>n</i> = 6 | AI <sup>a</sup><br><i>n</i> = 5 | TI <sup>a</sup><br><i>n</i> = 5 | GI <sup>a,b</sup><br><i>n</i> = 15 | Livers <sup>b</sup><br><i>n</i> = 15 |
| Perfluorocarboxylic acids (PFCAs)       | PFBA         | 100                     | 100                             | 0                              | 0                               | 0                               | 0                                  | 27                                   |
|                                         | PFPeA        | 0                       | 100                             | 0                              | 60                              | 0                               | 7                                  | 0                                    |
|                                         | PFHxA        | 100                     | 100                             | 100                            | 100                             | 0                               | 0                                  | 0                                    |
|                                         | PFHpA        | 100                     | 100                             | 0                              | 0                               | 0                               | 0                                  | 0                                    |
|                                         | PFOA         | 100                     | 100                             | 67                             | 60                              | 0                               | 40                                 | 0                                    |
|                                         | PFNA         | 100                     | 100                             | 0                              | 0                               | 0                               | 93                                 | 100                                  |
|                                         | PFDA         | 100                     | 100                             | 100                            | 60                              | 0                               | 100                                | 100                                  |
|                                         | PFUnA        | 0                       | 0                               | 33                             | 0                               | 0                               | 100                                | 100                                  |
|                                         | PFDoA        | 0                       | 0                               | 100                            | 100                             | 0                               | 100                                | 7                                    |
|                                         | PFTriDA      | 100                     | 0                               | 83                             | 100                             | 0                               | 100                                | 7                                    |
|                                         | PFTeDA       | 0                       | 0                               | 100                            | 100                             | 0                               | 100                                | 0                                    |
|                                         | PFHxDA       | 0                       | X                               | X                              | X                               | X                               | X                                  | X                                    |
|                                         | PFODA        | 0                       | X                               | X                              | X                               | X                               | X                                  | X                                    |
| Perfluorosulfonic acids (PFSAs)         | PFBS         | 100                     | 100                             | 0                              | 0                               | 0                               | 0                                  | 0                                    |
|                                         | PFPeS        | X                       | 67                              | 0                              | 0                               | 0                               | 0                                  | 0                                    |
|                                         | PFHxS        | 100                     | 100                             | 0                              | 0                               | 0                               | 0                                  | 0                                    |
|                                         | PFHpS        | X                       | 0                               | 0                              | 0                               | 0                               | 13                                 | 0                                    |
|                                         | PFOS         | 100                     | 100                             | 100                            | 100                             | 100                             | 100                                | 100                                  |
|                                         | PFNS         | X                       | 0                               | 33                             | 0                               | 0                               | 0                                  | 0                                    |
|                                         | PFDS         | 0                       | 0                               | 100                            | 100                             | 0                               | 100                                | 7                                    |
|                                         | PFDoS        | X                       | 0                               | 0                              | 0                               | 0                               | 0                                  | 0                                    |
| Fluorotelomer sulfonates                | 4:2 FTS      | X                       | 0                               | 0                              | 0                               | 0                               | 0                                  | 0                                    |
|                                         | 6:2 FTS      | 80                      | 100                             | 0                              | 20                              | 80                              | 0                                  | 0                                    |
|                                         | 8:2 FTS      | 60                      | 0                               | 0                              | 0                               | 0                               | 0                                  | 0                                    |
|                                         | 10:2 FTS     | 60                      | X                               | X                              | X                               | X                               | X                                  | X                                    |
| Fluorotelomer alcohols                  | 6:2 FTOH     | 100                     | X                               | X                              | X                               | X                               | X                                  | X                                    |
|                                         | 8:2 FTOH     | 100                     | X                               | X                              | X                               | X                               | X                                  | X                                    |
|                                         | 10:2 FTOH    | 100                     | X                               | X                              | X                               | X                               | X                                  | X                                    |
| Fluorotelomer carboxylates              | 3:3 FTCA     | X                       | 0                               | 0                              | 0                               | 0                               | 0                                  | 0                                    |
|                                         | 5:3 FTCA     | X                       | 0                               | 33                             | 100                             | 0                               | 80                                 | 40                                   |
|                                         | 7:3 FTCA     | X                       | 0                               | 0                              | 0                               | 0                               | 87                                 | 80                                   |
| Perfluorooctane sulfonamides            | PFOSA        | X                       | 0                               | 100                            | 100                             | 0                               | 60                                 | 0                                    |
|                                         | N-MeFOSA     | 100                     | 0                               | 0                              | 0                               | 0                               | 80                                 | 0                                    |
|                                         | N-EtFOSA     | 100                     | 0                               | 0                              | 0                               | 0                               | 67                                 | 0                                    |
| Perfluorooctane sulfonamidoacetic acids | N-MeFOSAA    | X                       | 100                             | 100                            | 100                             | 0                               | 100                                | 67                                   |
|                                         | N-EtFOSAA    | X                       | 100                             | 100                            | 100                             | 0                               | 100                                | 67                                   |
| Perfluorooctane sulfonamide ethanols    | N-MeFOSE     | 100                     | 0                               | 0                              | 0                               | 0                               | 0                                  | 0                                    |
|                                         | N-EtFOSE     | 100                     | 0                               | 0                              | 20                              | 0                               | 87                                 | 13                                   |
| Per- and polyfluoroether carboxylates   | HFPO-DA      | X                       | 0                               | 0                              | 0                               | 0                               | 0                                  | 0                                    |
|                                         | ADONA        | X                       | 0                               | 0                              | 0                               | 0                               | 0                                  | 0                                    |
|                                         | NFDHA        | X                       | 0                               | 0                              | 0                               | 0                               | 0                                  | 0                                    |
|                                         | PFMPA        | X                       | 0                               | 0                              | 0                               | 0                               | 0                                  | 0                                    |
|                                         | PFMBA        | X                       | 0                               | 0                              | 0                               | 0                               | 0                                  | 0                                    |
| Ether sulfonates                        | 9CI-PF3ONS   | X                       | 0                               | 0                              | 40                              | 0                               | 0                                  | 0                                    |
|                                         | 11CI-PF3OUdS | X                       | 0                               | 0                              | 0                               | 0                               | 0                                  | 0                                    |
|                                         | PFEESA       | X                       | 0                               | 0                              | 0                               | 0                               | 0                                  | 0                                    |

<sup>a</sup> SW = surface water, S = sediment, AI = aquatic invertebrates, TI = terrestrial invertebrates, GI = gastrointestinal tracts

<sup>b</sup> Tree swallow nestling tissues

**Table S4-** Instrument limit of detection (IDL) in air samples and minimum limit of detection (MLOD) in surface water, sediment, aquatic invertebrates, terrestrial invertebrates, and tree swallow nestling gastrointestinal tracts (GI tracts) and livers for 46 per- and polyfluoroalkyl substances. Congeners not analyzed within a given compartment are denoted with an X See Table S1 for full PFAS names.

| Subclass                                | Congener     | Air<br>(pg/m3) | SW <sup>a</sup><br>(ng/L) | S <sup>a</sup><br>(ng/g<br>dw) | AI <sup>a</sup><br>(ng/g<br>ww) | TI <sup>a</sup><br>(ng/g<br>ww) | GI <sup>a,b</sup><br>(ng/g<br>ww) | Liver <sup>b</sup><br>(ng/g ww) |
|-----------------------------------------|--------------|----------------|---------------------------|--------------------------------|---------------------------------|---------------------------------|-----------------------------------|---------------------------------|
| Perfluorocarboxylic acids               | PFBA         | 5.1            | 1.6                       | 1.2                            | 0.4                             | 1.1                             | 0.4                               | 2.3                             |
|                                         | PFPeA        | 0.14           | 0.8                       | 0.6                            | 0.2                             | 0.3                             | 0.2                               | 1.1                             |
|                                         | PFHxA        | 0.01           | 0.4                       | 0.3                            | 0.1                             | 0.1                             | 0.1                               | 0.6                             |
|                                         | PFHpA        | 0.00           | 0.4                       | 0.3                            | 0.1                             | 0.1                             | 0.1                               | 0.6                             |
|                                         | PFOA         | 0.01           | 0.4                       | 0.3                            | 0.1                             | 0.1                             | 0.1                               | 0.6                             |
|                                         | PFNA         | 0.02           | 0.4                       | 0.3                            | 0.1                             | 0.1                             | 0.1                               | 0.6                             |
|                                         | PFDA         | 1.82           | 0.4                       | 0.3                            | 0.1                             | 0.1                             | 0.1                               | 0.6                             |
|                                         | PFUnA        | 0.15           | 0.4                       | 0.3                            | 0.1                             | 0.1                             | 0.1                               | 0.6                             |
|                                         | PFDoA        | 0.20           | 0.4                       | 0.3                            | 0.1                             | 0.1                             | 0.1                               | 0.6                             |
|                                         | PFTTrDA      | 0.19           | 0.4                       | 0.3                            | 0.1                             | 0.1                             | 0.1                               | 0.6                             |
|                                         | PFTeDA       | 0.21           | 0.4                       | 0.3                            | 0.1                             | 0.1                             | 0.1                               | 0.6                             |
| Perfluorosulfonic acids                 | PFBS         | 0.05           | 0.4                       | 0.3                            | 0.1                             | 0.1                             | 0.1                               | 0.6                             |
|                                         | PFPeS        | X              | 0.4                       | 0.3                            | 0.1                             | 0.1                             | 0.1                               | 0.6                             |
|                                         | PFHxS        | 0.05           | 0.4                       | 0.3                            | 0.1                             | 0.1                             | 0.1                               | 0.6                             |
|                                         | PFHpS        | X              | 0.4                       | 0.3                            | 0.1                             | 0.1                             | 0.1                               | 0.6                             |
|                                         | PFOS         | 0.03           | 0.4                       | 0.3                            | 0.1                             | 0.1                             | 0.1                               | 0.6                             |
|                                         | PFNS         | X              | 0.4                       | 0.3                            | 0.1                             | 0.1                             | 0.1                               | 0.6                             |
|                                         | PFDS         | X              | 0.4                       | 0.3                            | 0.1                             | 0.1                             | 0.1                               | 0.6                             |
|                                         | PFDoS        | X              | 0.4                       | 0.3                            | 0.1                             | 0.1                             | 0.1                               | 0.6                             |
| Fluorotelomer sulfonates                | 4:2 FTS      | X              | 1.6                       | 1.2                            | 0.4                             | 0.4                             | 0.4                               | 2.3                             |
|                                         | 6:2 FTS      | X              | 1.5                       | 1.0                            | 0.3                             | 0.4                             | 0.4                               | 2.0                             |
|                                         | 8:2 FTS      | X              | 1.6                       | 1.2                            | 0.4                             | 0.4                             | 0.4                               | 2.3                             |
| Fluorotelomer alcohols                  | 6:2 FTOH     | 0.04           | X                         | X                              | X                               | X                               | X                                 | X                               |
|                                         | 8:2 FTOH     | 0.04           | X                         | X                              | X                               | X                               | X                                 | X                               |
|                                         | 10:2 FTOH    | 0.03           | X                         | X                              | X                               | X                               | X                                 | X                               |
| Fluorotelomer carboxylates              | 3:3 FTCA     | X              | 1.6                       | 1.2                            | 0.4                             | 0.4                             | 0.4                               | 2.3                             |
|                                         | 5:3 FTCA     | X              | 10.3                      | 7.2                            | 2.4                             | 2.5                             | 2.7                               | 14.2                            |
|                                         | 7:3 FTCA     | X              | 10.3                      | 7.2                            | N/A                             | 2.5                             | 2.7                               | 14.2                            |
| Perfluorooctane sulfonamides            | PFOSA        | X              | 0.4                       | 0.3                            | 0.1                             | 0.1                             | 0.1                               | 0.6                             |
|                                         | N-MeFOSA     | 0.02           | 0.5                       | 0.3                            | 0.1                             | 0.1                             | 0.2                               | 0.7                             |
|                                         | N-EtFOSA     | 0.02           | 1.0                       | 0.7                            | 0.2                             | 0.2                             | 0.3                               | 1.4                             |
| Perfluorooctane sulfonamidoacetic acids | N-MeFOSAA    | X              | 0.4                       | 0.3                            | 0.1                             | 0.1                             | 0.1                               | 0.6                             |
|                                         | N-EtFOSAA    | X              | 0.4                       | 0.3                            | 0.1                             | 0.1                             | 0.1                               | 0.6                             |
| Perfluorooctane sulfonamide ethanols    | N-MeFOSE     | 0.03           | 4.1                       | 2.9                            | 1.0                             | 1.0                             | 1.3                               | 5.7                             |
|                                         | N-EtFOSE     | 0.05           | 3.1                       | 2.2                            | 0.7                             | 0.7                             | 0.8                               | 4.2                             |
| Per- and polyfluoroether carboxylates   | HFPO-DA      | X              | 1.6                       | 1.1                            | 0.4                             | 0.4                             | 0.4                               | 2.2                             |
|                                         | ADONA        | X              | 1.6                       | 1.2                            | 0.4                             | 0.4                             | 0.4                               | 2.3                             |
|                                         | NFDHA        | X              | 0.8                       | 0.6                            | 0.3                             | 0.2                             | 0.2                               | 1.1                             |
|                                         | PFMPA        | X              | 0.8                       | 0.6                            | 0.2                             | 0.2                             | 0.2                               | 1.1                             |
|                                         | PFMBA        | X              | 0.4                       | 0.3                            | 0.1                             | 0.1                             | 0.1                               | 0.6                             |
| Ether Sulfonates                        | 9Cl-PF3ONS   | X              | 1.6                       | 1.2                            | 0.4                             | 0.4                             | 0.4                               | 2.3                             |
|                                         | 11Cl-PF3OUdS | X              | 1.6                       | 1.2                            | 0.4                             | 0.4                             | 0.4                               | 2.3                             |
|                                         | PFEESA       | X              | 0.4                       | 0.3                            | 0.1                             | 0.1                             | 0.1                               | 0.6                             |

<sup>a</sup> SW = surface water, S = sediment, AI = aquatic invertebrates, TI = terrestrial invertebrates, GI = gastrointestinal tracts

<sup>b</sup> Tree swallow nestling tissues

**Table S5** - Perfluoroalkyl substances (PFAS) that were detected in  $\geq 60$  % of samples and therefore included in subsequent statistical analyses. Checks indicate congeners  $\geq 60$  % detection frequency in the respective compartment, NA indicates  $\leq 60$  % detection frequency, or the congener wasn't analyzed.

| Subclass                                | Congener  | Air | SW <sup>a</sup> | S <sup>a</sup> | AI <sup>a</sup> | TI <sup>a</sup> | GI <sup>a,b</sup> | Liver <sup>b</sup> |
|-----------------------------------------|-----------|-----|-----------------|----------------|-----------------|-----------------|-------------------|--------------------|
| Perfluorocarboxylic acids               | PFBA      | ✓   | ✓               | NA             | NA              | NA              | NA                | NA                 |
|                                         | PFPeA     | NA  | ✓               | NA             | ✓               | NA              | NA                | NA                 |
|                                         | PFHxA     | ✓   | ✓               | ✓              | ✓               | NA              | NA                | NA                 |
|                                         | PFHpA     | ✓   | ✓               | NA             | NA              | NA              | NA                | NA                 |
|                                         | PFOA      | ✓   | ✓               | ✓              | ✓               | NA              | NA                | NA                 |
|                                         | PFNA      | ✓   | ✓               | NA             | NA              | NA              | ✓                 | ✓                  |
|                                         | PFDA      | ✓   | ✓               | ✓              | ✓               | NA              | ✓                 | ✓                  |
|                                         | PFUnA     | NA  | NA              | NA             | NA              | NA              | ✓                 | ✓                  |
|                                         | PFDoA     | NA  | NA              | ✓              | ✓               | NA              | ✓                 | NA                 |
|                                         | PFTTrDA   | ✓   | NA              | ✓              | ✓               | NA              | ✓                 | NA                 |
|                                         | PFTeDA    | NA  | NA              | ✓              | ✓               | NA              | ✓                 | NA                 |
| Perfluorosulfonic acids                 | PFBS      | ✓   | ✓               | NA             | NA              | NA              | NA                | NA                 |
|                                         | PFPeS     | NA  | ✓               | NA             | NA              | NA              | NA                | NA                 |
|                                         | PFHxS     | ✓   | ✓               | NA             | NA              | NA              | NA                | NA                 |
|                                         | PFHpS     | NA  | NA              | NA             | NA              | NA              | NA                | NA                 |
|                                         | PFOS      | ✓   | ✓               | ✓              | ✓               | ✓               | ✓                 | ✓                  |
|                                         | PFDS      | NA  | NA              | ✓              | ✓               | NA              | ✓                 | NA                 |
| Fluorotelomer sulfonates                | 6:2 FTS   | ✓   | ✓               | NA             | NA              | ✓               | NA                | NA                 |
|                                         | 8:2 FTS   | ✓   | NA              | NA             | NA              | NA              | NA                | NA                 |
|                                         | 10:2 FTS  | ✓   | NA              | NA             | NA              | NA              | NA                | NA                 |
| Fluorotelomer alcohols                  | 6:2 FTOH  | ✓   | NA              | NA             | NA              | NA              | NA                | NA                 |
|                                         | 8:2 FTOH  | ✓   | NA              | NA             | NA              | NA              | NA                | NA                 |
|                                         | 10:2 FTOH | ✓   | NA              | NA             | NA              | NA              | NA                | NA                 |
| Fluorotelomer carboxylates              | 5:3 FTCA  | NA  | NA              | NA             | ✓               | NA              | ✓                 | NA                 |
|                                         | 7:3 FTCA  | NA  | NA              | NA             | NA              | NA              | ✓                 | ✓                  |
| Perfluorooctane sulfonamides            | PFOSA     | NA  | NA              | ✓              | ✓               | NA              | ✓                 | NA                 |
|                                         | N-MeFOSA  | ✓   | NA              | NA             | NA              | NA              | ✓                 | NA                 |
|                                         | N-EtFOSA  | ✓   | NA              | NA             | NA              | NA              | ✓                 | NA                 |
| Perfluorooctane sulfonamidoacetic acids | N-MeFOSAA | NA  | ✓               | ✓              | ✓               | NA              | ✓                 | ✓                  |
|                                         | N-EtFOSAA | NA  | ✓               | ✓              | ✓               | NA              | ✓                 | ✓                  |
| Perfluorooctane sulfonamide ethanols    | N-MeFOSE  | ✓   | NA              | NA             | NA              | NA              | NA                | NA                 |
|                                         | N-EtFOSE  | ✓   | NA              | NA             | NA              | NA              | ✓                 | NA                 |

<sup>a</sup> SW = surface water, S = sediment, AI = aquatic invertebrates, TI = terrestrial invertebrates, GI = gastrointestinal tracts

<sup>b</sup> Tree swallow nestling tissues

**Table S6** - A comparison of five dietary fatty acids from aquatic invertebrates (AI), terrestrial invertebrates (TI), and tissues of tree swallow nestlings (i.e., livers, carcasses). Means  $\pm$  SEMs are presented, along with the results of Pearson/Spearman's correlations of fatty acids with the principal components generated by the principal component analysis (PCA) of FA proportions of these biota. See Fig. 2 for PCA biplot.

| Fatty Acid | Aquatic Invertebrates | Terrestrial Invertebrates | Tree Swallow Nestling     |                             | Overall Model                 | <i>Post-hoc</i> Results      | PC1          |                  | PC2         |                  |
|------------|-----------------------|---------------------------|---------------------------|-----------------------------|-------------------------------|------------------------------|--------------|------------------|-------------|------------------|
|            | ( <i>n</i> = 5)       | ( <i>n</i> = 5)           | Liver<br>( <i>n</i> = 11) | Carcass<br>( <i>n</i> = 13) |                               |                              | rho          | <i>p</i>         | rho         | <i>p</i>         |
| 18:2n6     | 6.33 $\pm$ 0.19       | 12.08 $\pm$ 0.32          | 8.41 $\pm$ 0.28           | 10.36 $\pm$ 0.08            | $F_{4,29} = 65.73, p < 0.001$ | TI > Carcasses > Livers > AI | <b>-0.08</b> | <b>&lt;0.001</b> | -0.1        | 0.58             |
| 18:3n3     | 5.56 $\pm$ 0.34       | 10.17 $\pm$ 0.68          | 0.93 $\pm$ 0.05           | 3.04 $\pm$ 0.13             | $F_{4,29} = 297.6, p < 0.001$ | TI > AI > Carcasses > Livers | <b>-0.74</b> | <b>&lt;0.001</b> | <b>0.53</b> | <b>0.002</b>     |
| 20:4n6     | 3.83 $\pm$ 0.17       | 0.58 $\pm$ 0.01           | 7.25 $\pm$ 0.64           | 1.59 $\pm$ 0.05             | $F_{4,29} = 38.02, p < 0.001$ | Livers > AI > Carcasses = TI | 0.22         | 0.21             | <b>0.82</b> | <b>&lt;0.001</b> |
| 20:5n3     | 7.4 $\pm$ 0.19        | 1.40 $\pm$ 0.06           | 3.16 $\pm$ 0.40           | 2.66 $\pm$ 0.10             | $F_{4,29} = 38.88, p < 0.001$ | AI > TI = Livers = Carcasses | <b>0.65</b>  | <b>&lt;0.001</b> | <b>0.35</b> | <b>0.04</b>      |
| 22:6n3     | 0.98 $\pm$ 0.02       | 0.08 $\pm$ 0.004          | 6.76 $\pm$ 0.46           | 0.87 $\pm$ 0.92             | $F_{4,29} = 85.79, p < 0.001$ | Livers > AI > Carcasses = TI | <b>0.92</b>  | <b>&lt;0.001</b> | -0.32       | 0.07             |



**Table S7** - Comparisons of perfluoroalkyl substance (PFAS) concentrations among abiotic and biotic compartments of a tree swallow food web. PFAS concentrations of terrestrial insects were excluded from these statistical comparisons except for PFOS and 6:2 FTS, since the remaining PFAS congeners were undetected (Table S4). Surface water (water), sediment (S), aquatic invertebrates (AI), terrestrial invertebrates (TI), nestling gastrointestinal tracts (GIT), nestling livers. See Table S1 for full PFAS names.

| Subclass                                | Congener                   | Overall Model                  | <i>Post-hoc</i> Results                 |
|-----------------------------------------|----------------------------|--------------------------------|-----------------------------------------|
| Short-chain PFCA                        | PFPeA                      | $F_{1,9} = 438.3$ $p < 0.001$  | Water > AI                              |
|                                         | PFHxA                      | $F_{3,18} = 65.31$ $p < 0.001$ | S > AI > Air = Water                    |
|                                         | PFOA                       | $F_{3,18} = 191.9$ $p < 0.001$ | S > AI > Air = Water                    |
|                                         | PFNA                       | $F_{3,37} = 7.92$ $p < 0.001$  | Liver > GIT > Water = Air               |
| Long-chain PFCA                         | PFDA                       | $F_{5,44} = 73.74$ $p < 0.001$ | Liver > GIT > S > AI > Air > Water      |
|                                         | PFUnA                      | $F_{1,23} = 118.1$ $p < 0.001$ | Liver > GIT                             |
|                                         | PFDoA                      | $F_{3,23} = 14.15$ $p < 0.001$ | S = AI > GIT                            |
|                                         | PFTTrDA                    | $F_{4,28} = 21.93$ $p < 0.001$ | S = AI = GIT > Air                      |
| Long-chain PFSA                         | PFTeDA                     | $F_{2,23} = 8.78$ $p = 0.001$  | S > GIT = AI                            |
|                                         | PFOS                       | $F_{6,50} = 112.7$ $p < 0.001$ | Liver > GIT > TI = S = AI > Air > Water |
|                                         | PFDS                       | $F_{3,23} = 34.15$ $p < 0.001$ | S > GIT = AI                            |
|                                         | Fluorotelomer sulfonamides | 6:2 FTS                        | $F_{3,13} = 591.3$ $p < 0.001$          |
| Fluorotelomer carboxylates              | 5:3 FTCA                   | $F_{1,17} = 10.08$ $p = 0.16$  | AI = GIT                                |
|                                         | 7:3 FTCA                   | $F_{1,28} = 40.74$ $p < 0.001$ | Liver > GIT                             |
| Perfluorooctane sulfonamides            | PFOSA                      | $F_{2,23} = 17.46$ $p < 0.001$ | S = AI > GIT                            |
|                                         | N-MeFOSA                   | $F_{1,18} = 17.09$ $p < 0.001$ | GIT > Air                               |
|                                         | N-EtFOSA                   | $F_{1,18} = 24.84$ $p < 0.001$ | GIT > Air                               |
| Perfluorooctane sulfonamidoacetic acids | N-MeFOSAA                  | $F_{4,42} = 10.38$ $p < 0.001$ | S > Liver = AI = GIT > Water            |
|                                         | N-EtFOSAA                  | $F_{4,42} = 15.75$ $p < 0.001$ | S > Liver = AI > GIT > Water            |
| Perfluorooctane sulfonamide ethanols    | N-EtFOSE                   | $F_{1,18} = 14.52$ $p < 0.001$ | GIT > Air                               |

**Table S8** – Standard deviations of calculated bioaccumulation factors (BAFs) and biomagnification factors (BMFs) for per- and polyfluoroalkyl substances (PFAS) in abiotic and biotic compartments of a tree swallow food web in southwestern Ontario in 2021. Nestling samples involved their gastrointestinal tract and livers.

|     | Short-Chain PFCAs        |       | Long-Chain PFCAs |      |      |       |         | Long-Chain PFSA |      | Precursors |          |       |          |          |           |           |          |     |
|-----|--------------------------|-------|------------------|------|------|-------|---------|-----------------|------|------------|----------|-------|----------|----------|-----------|-----------|----------|-----|
|     | PFPeA                    | PFHxA | PFOA             | PFNA | PFDA | PFDaA | PFTTrDA | PFOS            | PFDS | 6:2FTS     | 5:3 FTCA | PFOSA | N-MeFOSA | N-EtFOSA | N-MeFOSAA | N-EtFOSAA | N-EtFOSE |     |
| BAF | AI/SW <sup>a</sup>       | 0.97  | 4.99             | 2.26 | -    | 17.2  | -       | -               | 31.2 | -          | -        | -     | -        | -        | 19.5      | 0.62      | -        |     |
|     | AI/Sediment <sup>a</sup> | -     | 0.20             | 0.28 | -    | -     | 0.36    | 0.48            | 0.52 | 0.11       | -        | -     | 0.63     | -        | -         | 0.30      | 762      | -   |
|     | GI/SW <sup>a</sup>       | -     | -                | -    | 102  | 226   | -       | -               | 395  | -          | -        | -     | -        | -        | 12.0      | 139       | -        |     |
|     | Liver/SW <sup>a</sup>    | -     | -                | -    | 279  | -     | -       | -               | 1148 | -          | -        | -     | -        | -        | 26.6      | 276       | -        |     |
|     | TI/Air <sup>a</sup>      | -     | -                | -    | -    | -     | -       | -               | 20.7 | -          | 96.0     | -     | -        | -        | -         | -         | -        | -   |
|     | GI/Air <sup>a</sup>      | -     | -                | -    | 229  | 138   | -       | 21.8            | 96.3 | -          | -        | -     | -        | 240      | 115       | -         | -        | 176 |
|     | Liver/Air                | -     | -                | -    | 818  | 419   | -       | -               | 291  | -          | -        | -     | -        | -        | -         | -         | -        | -   |
| BMF | GI/AI <sup>a</sup>       | -     | -                | -    | -    | 2.22  | 0.15    | 0.13            | 1.68 | 0.27       | -        | 0.58  | 0.10     | -        | -         | 0.31      | 0.30     | -   |
|     | Liver/AI <sup>a</sup>    | -     | -                | -    | -    | 5.88  | -       | -               | 4.90 | -          | -        | -     | -        | -        | 0.71      | 0.65      | -        |     |
|     | GI/TI <sup>a</sup>       | -     | -                | -    | -    | -     | -       | -               | 1.43 | -          | -        | -     | -        | -        | -         | -         | -        |     |
|     | Liver/TI <sup>a</sup>    | -     | -                | -    | -    | -     | -       | -               | 4.24 | -          | -        | -     | -        | -        | -         | -         | -        |     |

<sup>a</sup> SW = surface water, S = sediment, AI = aquatic invertebrates, TI = terrestrial invertebrates, GI = gastrointestinal tracts

**Table S9** – Correlations of the first two dimensions of a multiple factor analysis (MFA) with the concentrations of individual PFAS congeners and precursors measured in abiotic (i.e., air, surface water, sediment) and biotic (i.e., aquatic and terrestrial macroinvertebrates, tree swallow nestling gastrointestinal tracts and livers) samples collected from an aquatic-terrestrial food web in southwestern Ontario. See Fig. 4 for the MFA variables and statistical results.

| Congener | Dimension 1  |                  | Dimension 2  |                  |
|----------|--------------|------------------|--------------|------------------|
|          | rho          | <i>p</i> -value  | rho          | <i>p</i> -value  |
| PFBA     | <b>-0.34</b> | <b>0.009</b>     | 0.22         | 0.10             |
| PFPeA    | 0.24         | 0.07             | -0.03        | 0.80             |
| PFHxA    | <b>0.77</b>  | <b>&lt;0.001</b> | 0.19         | 0.16             |
| PFHpA    | -0.10        | 0.47             | <b>-0.85</b> | <b>&lt;0.001</b> |
| PFOA     | <b>0.80</b>  | <b>&lt;0.001</b> | 0.25         | 0.06             |
| PFNA     | <b>-0.70</b> | <b>&lt;0.001</b> | <b>0.62</b>  | <b>&lt;0.001</b> |
| PFDA     | <b>-0.61</b> | <b>&lt;0.001</b> | <b>0.68</b>  | <b>&lt;0.001</b> |
| PFUnA    | <b>-0.68</b> | <b>&lt;0.001</b> | <b>0.67</b>  | <b>&lt;0.001</b> |
| PFDoA    | <b>0.87</b>  | <b>&lt;0.001</b> | <b>0.35</b>  | <b>0.009</b>     |
| PFTTrDA  | <b>0.76</b>  | <b>&lt;0.001</b> | <b>0.39</b>  | <b>0.003</b>     |
| PFTeDA   | <b>0.88</b>  | <b>&lt;0.001</b> | <b>0.33</b>  | <b>0.01</b>      |
| PFBS     | -0.11        | 0.43             | <b>-0.89</b> | <b>&lt;0.001</b> |
| PFHxS    | -0.10        | 0.47             | <b>-0.85</b> | <b>&lt;0.001</b> |
| PFOS     | <b>-0.67</b> | <b>&lt;0.001</b> | <b>0.66</b>  | <b>&lt;0.001</b> |
| PFDS     | <b>0.73</b>  | <b>&lt;0.001</b> | <b>0.36</b>  | <b>&lt;0.001</b> |
| 6:2 FTS  | 0.16         | 0.23             | -0.04        | 0.77             |
| N-MeFOSA | 0.13         | 0.32             | 0.25         | 0.06             |
| N-EtFOSA | 0.15         | 0.26             | 0.25         | 0.06             |
| N-MeFOSE | -0.07        | 0.63             | <b>-0.55</b> | <b>&lt;0.001</b> |
| N-EtFOSE | -0.07        | 0.61             | <b>0.29</b>  | <b>0.03</b>      |

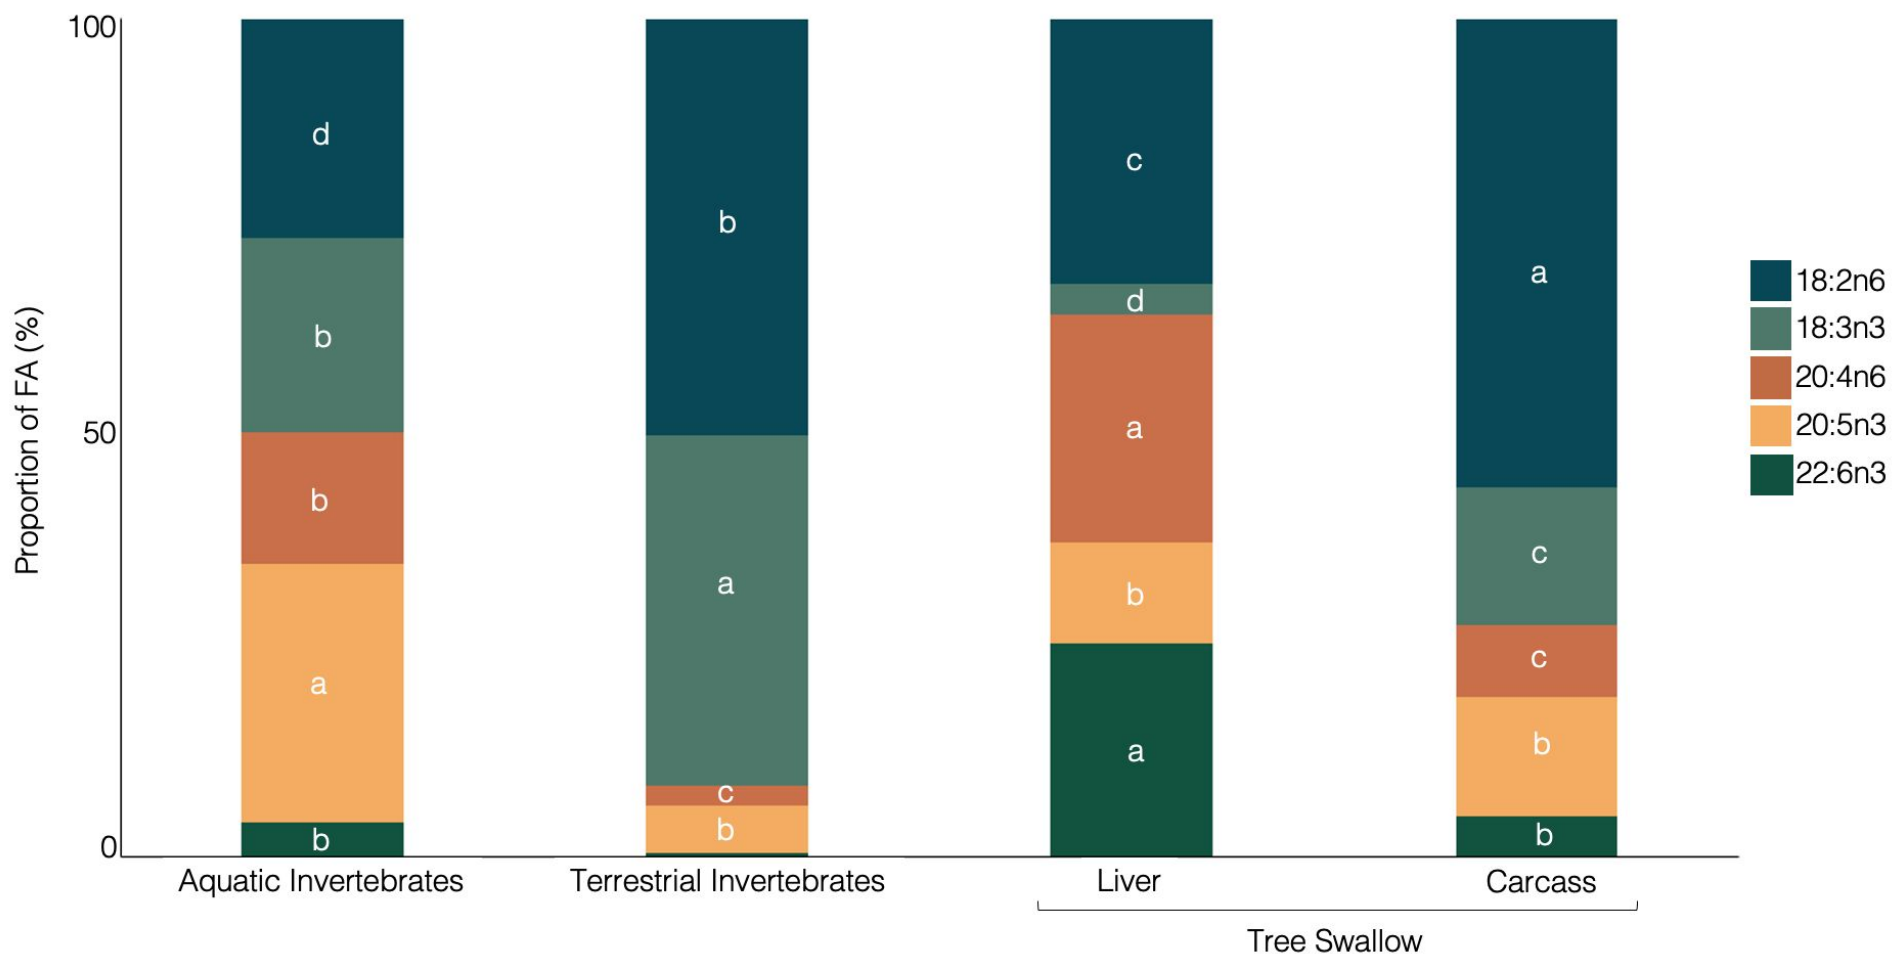

**Fig. S1** - Profiles of five selected dietary fatty acid (FA) proportions (% of  $\sum$ FA proportions) measured in aquatic invertebrates and terrestrial invertebrates, and in tree swallow nestling livers and carcasses. Letters denote significant differences in proportions between sample types (all  $p \leq 0.05$ ). Only the major dietary FAs, those with proportions greater than 0.1 % were examined, and we selected the top 5 major FAs in the tree swallow nestling carcass for statistical analysis.

**Table S10** – Values of stable carbon ( $\delta^{13}\text{C}$ ) and nitrogen ( $\delta^{15}\text{N}$ ) isotopes for all tree swallow nestling breast muscle samples collected in 2021 from an aquatic-terrestrial ecosystem in southwestern Ontario.

| Sample ID | Tissue        | $\delta^{13}\text{C}$ (‰) | $\delta^{15}\text{N}$ (‰) |
|-----------|---------------|---------------------------|---------------------------|
| WBS-1     | Breast Muscle | -23.9                     | 12.5                      |
| WBS-3     | Breast Muscle | -23.6                     | 12.8                      |
| WBS-4     | Breast Muscle | -23.5                     | 12.3                      |
| WBS-7     | Breast Muscle | -23                       | 12.7                      |
| WBS-12    | Breast Muscle | -24                       | 13.1                      |
| WBS-13    | Breast Muscle | -23                       | 12.3                      |
| WBS-18    | Breast Muscle | -22.5                     | 12.7                      |
| WBS-24    | Breast Muscle | -23.1                     | 14                        |
| WBS-29    | Breast Muscle | -23.6                     | 12.3                      |
| WBS-32    | Breast Muscle | -23.7                     | 12.2                      |
| WBS-34    | Breast Muscle | -22.7                     | 13.6                      |
| WBS-37    | Breast Muscle | -23.8                     | 12.5                      |
| WBS-38    | Breast Muscle | -22.7                     | 12.9                      |
| WBS-41    | Breast Muscle | -23.2                     | 13.2                      |
| WBS-49    | Breast Muscle | -23.4                     | 12.1                      |

**Table S11** – Proportions of individual fatty acids relative to the sum of the 66 fatty acids quantified in aquatic invertebrate, terrestrial invertebrate, and tree swallow liver and carcass samples collected in 2021 from an aquatic-terrestrial food web in southwestern Ontario.

| Sample ID | Compartment               | 8:0    | 10:0   | 12:0   | 13:0   | iso14:0 | 14:0   | 14:1n9 | 14:1n7 | 14:1n5 | iso15:0 | anti15:0 | 15:0   | 15:1n8 | 15:1n6 |
|-----------|---------------------------|--------|--------|--------|--------|---------|--------|--------|--------|--------|---------|----------|--------|--------|--------|
| HD01      | Aquatic Invertebrates     | 0.0075 | < MLOD | 0.357  | 0.1975 | 0.5715  | 1.733  | 0.1855 | 0.119  | 0.1835 | 1.6815  | 0.576    | 0.6575 | 0.028  | 0.101  |
| HD02      | Aquatic Invertebrates     | 0.009  | < MLOD | 0.367  | 0.185  | 0.5385  | 1.7315 | 0.136  | 0.146  | 0.2265 | 1.436   | 0.485    | 0.5935 | 0.028  | 0.106  |
| HD03      | Aquatic Invertebrates     | 0.0085 | < MLOD | 0.3345 | 0.1685 | 0.502   | 1.6915 | 0.1415 | 0.11   | 0.1915 | 1.3595  | 0.4545   | 0.567  | 0.0265 | 0.091  |
| HD04      | Aquatic Invertebrates     | 0.009  | 0.02   | 0.338  | 0.1745 | 0.5245  | 1.7515 | 0.121  | 0.107  | 0.23   | 1.3965  | 0.4785   | 0.5725 | 0.028  | 0.103  |
| HD05      | Aquatic Invertebrates     | 0.006  | < MLOD | 0.344  | 0.1795 | 0.5245  | 1.707  | 0.128  | 0.122  | 0.207  | 1.395   | 0.4735   | 0.5805 | 0.024  | 0.086  |
| TR01      | Terrestrial Invertebrates | 0.081  | 0.058  | 0.5445 | 0.011  | 0.037   | 2.0175 | 0.051  | 0.0665 | 0.664  | 0.0395  | 0.0515   | 0.1185 | 0.0045 | 0.0355 |
| TR02      | Terrestrial Invertebrates | 0.111  | 0.1085 | 0.459  | 0.0105 | 0.0335  | 1.733  | 0.0565 | 0.0705 | 0.545  | 0.061   | 0.0405   | 0.1215 | 0.0045 | 0.038  |
| TR03      | Terrestrial Invertebrates | 0.1525 | 0.069  | 0.5415 | 0.011  | 0.029   | 2.572  | 0.058  | 0.058  | 0.455  | 0.0665  | 0.0465   | 0.123  | 0.003  | 0.04   |
| TR04      | Terrestrial Invertebrates | 0.085  | < MLOD | 0.434  | 0.014  | 0.033   | 2.394  | 0.054  | 0.077  | 0.442  | 0.08    | 0.046    | 0.128  | 0.005  | 0.036  |
| TR05      | Terrestrial Invertebrates | 0.048  | < MLOD | 0.371  | 0.013  | 0.042   | 2.252  | 0.088  | 0.069  | 0.575  | 0.072   | 0.052    | 0.136  | 0.006  | 0.051  |
| WBS-1L    | Tree Swallow Liver        | < MLOD | 0.004  | 0.058  | 0.013  | 0.037   | 0.852  | 0.007  | 0.022  | 0.069  | 0.062   | 0.029    | 0.121  | 0.001  | 0.02   |
| WBS-3L    | Tree Swallow Liver        | < MLOD | < MLOD | 0.067  | 0.014  | 0.027   | 1.412  | 0.011  | 0.029  | 0.156  | 0.096   | 0.044    | 0.148  | 0.013  | 0.032  |
| WBS-4L    | Tree Swallow Liver        | < MLOD | < MLOD | < MLOD | < MLOD | 0.148   | 0.119  | 0.017  | 0.014  | 0.18   | 0.043   | 0.043    | 0.032  | <MLOQ  | 0.032  |
| WBS-7L    | Tree Swallow Liver        | 0.007  | < MLOD | 0.047  | 0.009  | 0.033   | 1.269  | 0.011  | 0.022  | 0.047  | 0.1     | 0.04     | 0.127  | 0.006  | 0.026  |
| WBS-12L   | Tree Swallow Liver        | < MLOD | < MLOD | 0.057  | 0.014  | 0.017   | 1.208  | 0.002  | 0.024  | 0.075  | 0.096   | 0.042    | 0.141  | <MLOQ  | 0.036  |
| WBS-13L   | Tree Swallow Liver        | 0.007  | < MLOD | 0.028  | 0.008  | 0.043   | 0.829  | 0.007  | 0.016  | 0.054  | 0.073   | 0.03     | 0.123  | 0.004  | 0.034  |
| WBS-24L   | Tree Swallow Liver        | < MLOD | < MLOD | 0.014  | < MLOD | 0.385   | 0.153  | 0.006  | 0.006  | 0.17   | 0.014   | 0.044    | 0.03   | <MLOQ  | 0.016  |
| WBS-29L   | Tree Swallow Liver        | 0.007  | < MLOD | 0.044  | 0.012  | 0.032   | 1.558  | 0.009  | 0.024  | 0.128  | 0.136   | 0.053    | 0.164  | 0.006  | 0.028  |
| WBS-32L   | Tree Swallow Liver        | < MLOD | < MLOD | 0.029  | < MLOD | 0.027   | 0.571  | 0.015  | 0.016  | 0.035  | 0.051   | 0.02     | 0.127  | <MLOQ  | 0.061  |
| WBS-37L   | Tree Swallow Liver        | < MLOD | < MLOD | 0.052  | 0.011  | 0.038   | 1.472  | 0.006  | 0.025  | 0.134  | 0.115   | 0.042    | 0.14   | 0.007  | 0.025  |
| WBS-41L   | Tree Swallow Liver        | < MLOD | < MLOD | 0.042  | 0.009  | 0.033   | 0.571  | 0.005  | 0.018  | 0.04   | 0.046   | 0.02     | 0.129  | <MLOQ  | 0.021  |
| WBS-49L   | Tree Swallow Liver        | 0.015  | < MLOD | 0.073  | 0.021  | 0.019   | 0.589  | 0.006  | 0.033  | 0.074  | 0.045   | 0.023    | 0.149  | <MLOQ  | 0.061  |
| WBS-1C    | Tree Swallow Carcass      | 0.0255 | < MLOD | 0.633  | 0.0465 | 0.077   | 3.904  | 0.0275 | 0.1645 | 0.322  | 0.2255  | 0.1445   | 0.3075 | 0.0095 | 0.054  |
| WBS-3C    | Tree Swallow Carcass      | 0.0455 | < MLOD | 0.783  | 0.0435 | 0.055   | 3.8315 | 0.034  | 0.1785 | 0.4935 | 0.203   | 0.1205   | 0.308  | 0.012  | 0.055  |
| WBS-4C    | Tree Swallow Carcass      | 0.027  | < MLOD | 0.8695 | 0.058  | 0.0735  | 4.413  | 0.033  | 0.1425 | 0.5435 | 0.2235  | 0.138    | 0.3345 | 0.012  | 0.0505 |
| WBS-7C    | Tree Swallow Carcass      | 0.0235 | < MLOD | 0.63   | 0.0485 | 0.062   | 4.0475 | 0.0345 | 0.187  | 0.4125 | 0.1945  | 0.117    | 0.2885 | 0.01   | 0.047  |

| Sample ID | Compartment          | 8:0    | 10:0   | 12:0   | 13:0   | iso14:0 | 14:0   | 14:1n9 | 14:1n7 | 14:1n5 | iso15:0 | anti15:0 | 15:0   | 15:1n8 | 15:1n6 |
|-----------|----------------------|--------|--------|--------|--------|---------|--------|--------|--------|--------|---------|----------|--------|--------|--------|
| WBS-12C   | Tree Swallow Carcass | 0.023  | < MLOD | 0.742  | 0.045  | 0.072   | 3.7185 | 0.0375 | 0.146  | 0.397  | 0.113   | 0.1405   | 0.317  | 0.011  | 0.054  |
| WBS-13C   | Tree Swallow Carcass | 0.05   | < MLOD | 0.756  | 0.0595 | 0.1085  | 4.767  | 0.0355 | 0.1675 | 0.544  | 0.1385  | 0.168    | 0.3695 | 0.012  | 0.06   |
| WBS-18C   | Tree Swallow Carcass | 0.0435 | < MLOD | 0.738  | 0.0515 | 0.0955  | 4.011  | 0.0295 | 0.155  | 0.424  | 0.2205  | 0.1405   | 0.3155 | 0.0115 | 0.0535 |
| WBS-24C   | Tree Swallow Carcass | 0.0415 | < MLOD | 0.761  | 0.051  | 0.0845  | 3.7615 | 0.0395 | 0.1485 | 0.4975 | 0.2135  | 0.1305   | 0.3075 | 0.013  | 0.0505 |
| WBS-29C   | Tree Swallow Carcass | 0.026  | < MLOD | 0.718  | 0.0525 | 0.097   | 4.185  | 0.034  | 0.1695 | 0.466  | 0.1255  | 0.1545   | 0.3285 | 0.0095 | 0.0545 |
| WBS-32C   | Tree Swallow Carcass | 0.028  | < MLOD | 0.647  | 0.053  | 0.0895  | 3.691  | 0.035  | 0.169  | 0.476  | 0.2235  | 0.136    | 0.3175 | 0.011  | 0.058  |
| WBS-34C   | Tree Swallow Carcass | 0.05   | < MLOD | 0.6185 | 0.0445 | 0.0885  | 3.5275 | 0.035  | 0.1585 | 0.2615 | 0.2305  | 0.1305   | 0.3255 | 0.0095 | 0.039  |
| WBS-37C   | Tree Swallow Carcass | 0.032  | < MLOD | 0.8315 | 0.045  | 0.0775  | 4.291  | 0.0315 | 0.182  | 0.517  | 0.2085  | 0.126    | 0.296  | 0.01   | 0.05   |
| WBS-38C   | Tree Swallow Carcass | 0.034  | < MLOD | 0.5705 | 0.0525 | 0.088   | 3.8245 | 0.033  | 0.1535 | 0.301  | 0.2505  | 0.15     | 0.35   | 0.01   | 0.0575 |
| WBS-41C   | Tree Swallow Carcass | 0.034  | < MLOD | 0.729  | 0.051  | 0.089   | 4.1745 | 0.0335 | 0.171  | 0.358  | 0.121   | 0.1475   | 0.343  | 0.008  | 0.053  |
| WBS-49C   | Tree Swallow Carcass | 0.059  | < MLOD | 0.6705 | 0.0505 | 0.0925  | 3.669  | 0.0415 | 0.1595 | 0.506  | 0.2175  | 0.1365   | 0.3195 | 0.008  | 0.0505 |

| Sample ID | Compartment               | iso16:0 | 16:0    | 16:1n11 | 16:1n9 | 16:1n7  | 7Me16:0 | 16:1n5 | 16:2n6 | iso17:0 | 16:2n4 | 16:3n6 | 17:0   | 16:3n4 | 17:1   |
|-----------|---------------------------|---------|---------|---------|--------|---------|---------|--------|--------|---------|--------|--------|--------|--------|--------|
| HD01      | Aquatic Invertebrates     | 0.021   | 17.713  | 0.555   | 0.5545 | 12.8705 | 0.961   | 1.0625 | 0.5015 | 0.2925  | 0.413  | 0.4795 | 0.6145 | 0.6675 | 1.0685 |
| HD02      | Aquatic Invertebrates     | 0.026   | 17.266  | 0.4085  | 0.735  | 12.239  | 0.8295  | 0.4925 | 0.459  | 0.3665  | 0.4525 | 0.6205 | 0.5685 | 0.8255 | 1.3865 |
| HD03      | Aquatic Invertebrates     | 0.0245  | 16.5675 | 0.4955  | 0.6245 | 11.9075 | 0.8115  | 0.942  | 0.4235 | 0.3605  | 0.4315 | 0.609  | 0.561  | 0.8085 | 1.3025 |
| HD04      | Aquatic Invertebrates     | 0.0225  | 17.3955 | 0.3905  | 0.749  | 12.16   | 0.8105  | 0.025  | 0.4365 | 0.3765  | 0.4485 | 0.659  | 0.57   | 0.8545 | 1.3705 |
| HD05      | Aquatic Invertebrates     | 0.02    | 17.0815 | 0.383   | 0.7775 | 11.981  | 0.803   | 0.4615 | 0.4685 | 0.3885  | 0.4395 | 0.612  | 0.5615 | 0.8395 | 1.4805 |
| TR01      | Terrestrial Invertebrates | 0.012   | 17.284  | 0.0355  | 0.6595 | 19.2585 | 0.08    | 0.0075 | 0.126  | 0.1015  | 0.0755 | 0.1235 | 0.1665 | 0.034  | 0.264  |
| TR02      | Terrestrial Invertebrates | 0.0115  | 17.3915 | 0.0305  | 0.74   | 20.2165 | 0.0735  | 0.0055 | 0.087  | 0.108   | 0.0515 | 0.117  | 0.1575 | 0.033  | 0.278  |
| TR03      | Terrestrial Invertebrates | 0.0115  | 15.59   | 0.0275  | 0.6365 | 18.6735 | 0.0775  | 0.007  | 0.176  | 0.1545  | 0.032  | 0.111  | 0.1545 | 0.035  | 0.2585 |
| TR04      | Terrestrial Invertebrates | 0.012   | 16.968  | 0.02    | 0.736  | 20.21   | 0.077   | 0.007  | 0.144  | 0.108   | 0.06   | 0.127  | 0.189  | 0.066  | 0.27   |
| TR05      | Terrestrial Invertebrates | 0.013   | 15.658  | 0.028   | 0.796  | 23.456  | 0.092   | 0.002  | 0.098  | 0.111   | 0.097  | 0.078  | 0.156  | 0.056  | 0.321  |
| WBS-1L    | Tree Swallow Liver        | 0.03    | 22.882  | 0.059   | <MLOQ  | 4.068   | 0.012   | 0.009  | 0.003  | 0.119   | 0.012  | 0.113  | 0.488  | 0.037  | 0.156  |
| WBS-3L    | Tree Swallow Liver        | 0.048   | 28.128  | 0.048   | 0.206  | 5.949   | 0.021   | 0.086  | <MLOQ  | 0.106   | 0.087  | 0.207  | 0.431  | 0.026  | 0.207  |
| WBS-4L    | Tree Swallow Liver        | 0.09    | 20.62   | 0.043   | 0.109  | 3.093   | 0.085   | 0.122  | <MLOQ  | 0.129   | <MLOQ  | 0.15   | 0.723  | <MLOQ  | 0.15   |
| WBS-7L    | Tree Swallow Liver        | 0.004   | 26.702  | 0.033   | 0.168  | 4.433   | 0.076   | 0.015  | <MLOQ  | 0.087   | 0.01   | 0.208  | 0.461  | 0.017  | 0.154  |

| Sample ID | Compartment          | iso16:0 | 16:0    | 16:1n11 | 16:1n9 | 16:1n7  | 7Me16:0 | 16:1n5 | 16:2n6 | iso17:0 | 16:2n4 | 16:3n6 | 17:0   | 16:3n4 | 17:1   |
|-----------|----------------------|---------|---------|---------|--------|---------|---------|--------|--------|---------|--------|--------|--------|--------|--------|
| WBS-12L   | Tree Swallow Liver   | 0.009   | 24.618  | 0.024   | 0.204  | 4.152   | 0.093   | 0.017  | <MLOQ  | 0.141   | 0.051  | 0.144  | 0.484  | 0.027  | 0.17   |
| WBS-13L   | Tree Swallow Liver   | 0.005   | 23.394  | 0.046   | 0.141  | 3.047   | 0.078   | 0.022  | <MLOQ  | 0.088   | 0.039  | 0.116  | 0.52   | 0.025  | 0.134  |
| WBS-24L   | Tree Swallow Liver   | 0.034   | 29.89   | 0.017   | 0.231  | 3.969   | 0.062   | 0.097  | <MLOQ  | 0.1     | <MLOQ  | 0.108  | 0.62   | <MLOQ  | 0.154  |
| WBS-29L   | Tree Swallow Liver   | 0.004   | 29.36   | 0.017   | 0.205  | 6.405   | 0.101   | 0.11   | 0.009  | 0.017   | 0.004  | 0.253  | 0.48   | 0.009  | 0.227  |
| WBS-32L   | Tree Swallow Liver   | 0.036   | 20.791  | 0.049   | 0.191  | 3.172   | 0.073   | 0.084  | <MLOQ  | 0.072   | 0.024  | 0.101  | 0.493  | <MLOQ  | 0.104  |
| WBS-37L   | Tree Swallow Liver   | 0.007   | 27.567  | 0.015   | 0.191  | 6.04    | 0.095   | 0.019  | <MLOQ  | 0.096   | 0.011  | 0.234  | 0.391  | 0.024  | 0.183  |
| WBS-41L   | Tree Swallow Liver   | 0.023   | 21.822  | 0.023   | 0.157  | 3.647   | 0.079   | 0.006  | <MLOQ  | 0.081   | 0.022  | 0.148  | 0.519  | 0.021  | 0.128  |
| WBS-49L   | Tree Swallow Liver   | 0.008   | 22.083  | 0.031   | 0.203  | 3.976   | 0.109   | 0.011  | <MLOQ  | 0.122   | 0.027  | 0.114  | 0.671  | 0.009  | 0.112  |
| WBS-1C    | Tree Swallow Carcass | 0.05    | 20.418  | 0.1095  | 0.4885 | 18.388  | 0.2455  | 0.009  | 0.0375 | 0.0855  | 0.053  | 0.9245 | 0.392  | 0.2265 | 0.3885 |
| WBS-3C    | Tree Swallow Carcass | 0.0585  | 21.2015 | 0.119   | 0.5655 | 17.6135 | 0.228   | 0.0165 | 0.03   | 0.084   | 0.0605 | 0.7815 | 0.4355 | 0.23   | 0.4395 |
| WBS-4C    | Tree Swallow Carcass | 0.0585  | 22.4545 | 0.166   | 0.5105 | 15.945  | 0.2465  | 0.0655 | 0.0315 | 0.1295  | 0.0675 | 0.729  | 0.431  | 0.1745 | 0.5735 |
| WBS-7C    | Tree Swallow Carcass | 0.0535  | 21.5    | 0.0995  | 0.525  | 19.175  | 0.2385  | 0.0125 | 0.034  | 0.081   | 0.05   | 0.897  | 0.352  | 0.233  | 0.338  |
| WBS-12C   | Tree Swallow Carcass | 0.0605  | 22.4625 | 0.182   | 0.5755 | 17.3825 | 0.224   | 0.0075 | 0.0305 | 0.0845  | 0.0545 | 0.726  | 0.42   | 0.192  | 0.4335 |
| WBS-13C   | Tree Swallow Carcass | 0.0625  | 22.739  | 0.1095  | 0.4295 | 18.066  | 0.276   | 0.074  | 0.0445 | 0.0945  | 0.059  | 1.023  | 0.4345 | 0.2365 | 0.41   |
| WBS-18C   | Tree Swallow Carcass | 0.0555  | 22.046  | 0.0885  | 0.502  | 18.5025 | 0.2435  | 0.005  | 0.033  | 0.0935  | 0.0545 | 0.9255 | 0.398  | 0.229  | 0.359  |
| WBS-24C   | Tree Swallow Carcass | 0.0565  | 20.891  | 0.112   | 0.491  | 16.587  | 0.233   | 0.0155 | 0.036  | 0.0865  | 0.0565 | 0.766  | 0.438  | 0.206  | 0.422  |
| WBS-29C   | Tree Swallow Carcass | 0.047   | 21.9095 | 0.0755  | 0.553  | 18.8585 | 0.2585  | 0.0675 | 0.0425 | 0.094   | 0.059  | 0.9195 | 0.4315 | 0.2745 | 0.446  |
| WBS-32C   | Tree Swallow Carcass | 0.047   | 22.2945 | 0.0855  | 0.5765 | 18.9035 | 0.24    | 0.0145 | 0.039  | 0.083   | 0.051  | 0.843  | 0.394  | 0.197  | 0.412  |
| WBS-34C   | Tree Swallow Carcass | 0.0765  | 21.559  | 0.1515  | 0.4325 | 12.5095 | 0.2135  | 0.123  | 0.035  | 0.124   | 0.0585 | 0.6775 | 0.5265 | 0.1835 | 0.605  |
| WBS-37C   | Tree Swallow Carcass | 0.0345  | 21.568  | 0.0785  | 0.4515 | 18.403  | 0.222   | 0.113  | 0.0405 | 0.0815  | 0.0555 | 0.9195 | 0.381  | 0.2535 | 0.3895 |
| WBS-38C   | Tree Swallow Carcass | 0.031   | 23.191  | 0.089   | 0.4805 | 18.6065 | 0.251   | 0.13   | 0.04   | 0.107   | 0.065  | 0.953  | 0.427  | 0.238  | 0.5405 |
| WBS-41C   | Tree Swallow Carcass | 0.0295  | 22.14   | 0.11    | 0.466  | 19.455  | 0.2605  | 0.0115 | 0.0395 | 0.091   | 0.057  | 0.989  | 0.4365 | 0.2525 | 0.513  |
| WBS-49C   | Tree Swallow Carcass | 0.0475  | 22.0435 | 0.1075  | 0.579  | 17.617  | 0.2265  | 0.0145 | 0.0415 | 0.094   | 0.052  | 0.708  | 0.436  | 0.1445 | 0.468  |



| Sample ID | Compartment               | 16:3n1 | 16:4n3 | 16:4n1 | 18:0   | 18:1n13 | 18:1n11 | 18:1n9  | 18:1n7 | 18:1n5 | 18:2D5,11 | 18:2n7 | 18:2n6  | 18:2n4 | 18:3n6 |
|-----------|---------------------------|--------|--------|--------|--------|---------|---------|---------|--------|--------|-----------|--------|---------|--------|--------|
| HD01      | Aquatic Invertebrates     | 0.0065 | 0.0175 | 0.0225 | 5.223  | 0.27    | 0.1785  | 15.2305 | 7.7815 | 0.5505 | 0.281     | 0.1105 | 5.612   | 0.0795 | 0.1275 |
| HD02      | Aquatic Invertebrates     | 0.0095 | 0.021  | 0.025  | 4.777  | 0.245   | 0.148   | 14.5715 | 7.1135 | 0.4865 | 0.225     | 0.0935 | 6.38    | 0.0795 | 0.123  |
| HD03      | Aquatic Invertebrates     | 0.0065 | 0.028  | 0.031  | 4.672  | 0.2405  | 0.132   | 14.202  | 6.99   | 0.4805 | 0.232     | 0.094  | 6.539   | 0.083  | 0.1255 |
| HD04      | Aquatic Invertebrates     | 0.011  | 0.028  | 0.0275 | 4.82   | 0.2365  | 0.1755  | 14.517  | 6.9135 | 0.4685 | 0.2265    | 0.095  | 6.5525  | 0.0805 | 0.1195 |
| HD05      | Aquatic Invertebrates     | 0.0065 | 0.021  | 0.0255 | 4.6335 | 0.246   | 0.1405  | 14.813  | 7.032  | 0.4855 | 0.1265    | 0.095  | 6.585   | 0.079  | 0.1135 |
| TR01      | Terrestrial Invertebrates | 0.002  | 0.0105 | 0.006  | 4.26   | 0.006   | 0.021   | 26.1595 | 0.766  | 0.0295 | 0.1845    | 0.0525 | 11.506  | 0.014  | 0.0355 |
| TR02      | Terrestrial Invertebrates | <MLOQ  | 0.0225 | 0.012  | 4.2975 | 0.01    | 0.035   | 25.04   | 0.759  | 0.0305 | 0.218     | 0.0695 | 11.3365 | 0.0115 | 0.0465 |
| TR03      | Terrestrial Invertebrates | <MLOQ  | 0.0125 | 0.009  | 4.999  | 0.006   | 0.0255  | 27.239  | 0.674  | 0.0275 | 0.295     | 0.0815 | 12.8725 | 0.0105 | 0.0515 |
| TR04      | Terrestrial Invertebrates | <MLOQ  | 0.011  | 0.012  | 4.505  | 0.017   | 0.045   | 24.955  | 0.968  | 0.039  | 0.019     | 0.072  | 11.896  | 0.01   | 0.078  |
| TR05      | Terrestrial Invertebrates | <MLOQ  | 0.024  | 0.008  | 4.386  | 0.012   | 0.033   | 25.424  | 0.949  | 0.032  | 0.188     | 0.078  | 12.802  | 0.006  | 0.032  |
| WBS-1L    | Tree Swallow Liver        | <MLOQ  | 0.084  | 0.023  | 20.415 | 0.054   | 0.029   | 9.481   | 3.407  | 0.049  | 0.087     | 0.084  | 9.026   | 0.073  | 0.115  |
| WBS-3L    | Tree Swallow Liver        | 0.015  | 0.378  | 0.035  | 18.607 | 0.073   | <MLOQ   | 11.368  | 3.59   | 0.065  | 0.138     | 0.11   | 7.122   | 0.089  | 0.133  |
| WBS-4L    | Tree Swallow Liver        | 0.06   | 0.042  | 0.007  | 20.35  | <MLOQ   | <MLOQ   | 7.507   | 3.148  | 0.057  | 0.224     | 0.18   | 8.841   | 0.105  | 0.161  |
| WBS-7L    | Tree Swallow Liver        | 0.008  | 0.046  | 0.021  | 20.538 | 0.048   | 0.023   | 8.026   | 3.618  | 0.053  | 0.127     | 0.093  | 8.075   | 0.106  | 0.1    |
| WBS-12L   | Tree Swallow Liver        | 0.01   | 0.047  | <MLOQ  | 18.128 | 0.048   | 0.084   | 12.31   | 3.404  | 0.063  | 0.143     | 0.082  | 8.594   | 0.089  | 0.105  |
| WBS-13L   | Tree Swallow Liver        | 0.01   | 0.053  | 0.004  | 19.692 | 0.052   | 0.113   | 8.534   | 3.702  | 0.059  | 0.117     | 0.074  | 8.658   | 0.093  | 0.104  |
| WBS-24L   | Tree Swallow Liver        | 0.046  | 0.028  | 0.02   | 19.071 | <MLOQ   | 0.108   | 10.451  | 3.238  | 0.044  | 0.227     | 0.133  | 7.637   | 0.092  | 0.157  |
| WBS-29L   | Tree Swallow Liver        | 0.007  | 0.029  | 0.006  | 16.559 | 0.033   | 0.023   | 11.474  | 3.93   | 0.064  | 0.052     | 0.097  | 8.127   | 0.104  | 0.075  |
| WBS-32L   | Tree Swallow Liver        | 0.007  | 0.073  | 0.01   | 19.153 | 0.072   | 0.072   | 8.183   | 3.275  | 0.059  | 0.094     | 0.074  | 7.817   | 0.075  | 0.08   |
| WBS-37L   | Tree Swallow Liver        | 0.008  | 0.03   | 0.008  | 17.729 | 0.053   | 0.05    | 13.753  | 3.774  | 0.068  | 0.078     | 0.089  | 6.984   | 0.104  | 0.076  |
| WBS-41L   | Tree Swallow Liver        | MLOQ   | 0.042  | <MLOQ  | 20.02  | 0.034   | 0.049   | 7.021   | 3.362  | 0.044  | 0.077     | 0.081  | 9.587   | 0.074  | 0.105  |
| WBS-49L   | Tree Swallow Liver        | 0.006  | 0.071  | 0.01   | 18.696 | 0.038   | 0.02    | 8.011   | 3.323  | 0.042  | 0.128     | 0.088  | 9.832   | 0.065  | 0.193  |
| WBS-1C    | Tree Swallow Carcass      | 0.0035 | 0.0235 | 0.0135 | 6.9575 | 0.0275  | 0.0405  | 14.5505 | 3.6145 | 0.0555 | 0.031     | 0.134  | 10.2185 | 0.0475 | 0.049  |
| WBS-3C    | Tree Swallow Carcass      | 0.0075 | 0.133  | 0.0065 | 8.4655 | 0.045   | 0.077   | 15.632  | 4.159  | 0.069  | 0.0355    | 0.132  | 10.14   | 0.0835 | 0.072  |
| WBS-4C    | Tree Swallow Carcass      | 0.006  | 0.182  | 0.006  | 8.2    | 0.04    | 0.0515  | 15.7675 | 3.512  | 0.067  | 0.0325    | 0.126  | 10.5765 | 0.0585 | 0.0805 |
| WBS-7C    | Tree Swallow Carcass      | 0.0055 | 0.129  | 0.006  | 7.4885 | 0.04    | 0.0595  | 17.0055 | 4.0805 | 0.0645 | 0.038     | 0.126  | 10.442  | 0.065  | 0.0545 |

| Sample ID | Compartment          | 16:3n1 | 16:4n3 | 16:4n1 | 18:0    | 18:1n13 | 18:1n11 | 18:1n9  | 18:1n7 | 18:1n5 | 18:2D5,11 | 18:2n7 | 18:2n6  | 18:2n4 | 18:3n6 |
|-----------|----------------------|--------|--------|--------|---------|---------|---------|---------|--------|--------|-----------|--------|---------|--------|--------|
| WBS-12C   | Tree Swallow Carcass | 0.0045 | 0.08   | 0.008  | 8.0815  | 0.048   | 0.0555  | 17.288  | 4.0015 | 0.0645 | 0.036     | 0.1255 | 10.705  | 0.0595 | 0.07   |
| WBS-13C   | Tree Swallow Carcass | 0.003  | 0.377  | 0.0075 | 8.1805  | 0.036   | 0.034   | 13.5115 | 3.693  | 0.0685 | 0.0385    | 0.1295 | 10.289  | 0.062  | 0.061  |
| WBS-18C   | Tree Swallow Carcass | 0.005  | 0.1635 | 0.0195 | 8.1655  | 0.0305  | 0.064   | 14.981  | 3.923  | 0.0735 | 0.041     | 0.135  | 10.353  | 0.0625 | 0.064  |
| WBS-24C   | Tree Swallow Carcass | 0.005  | 0.3305 | 0.0095 | 8.07    | 0.0485  | 0.065   | 15.9255 | 4.1565 | 0.073  | 0.035     | 0.1285 | 10.697  | 0.06   | 0.079  |
| WBS-29C   | Tree Swallow Carcass | 0.005  | 0.2785 | 0.0085 | 7.613   | 0.036   | 0.044   | 15.0905 | 3.929  | 0.0685 | 0.036     | 0.139  | 10.36   | 0.0575 | 0.0635 |
| WBS-32C   | Tree Swallow Carcass | 0.005  | 0.3055 | 0.006  | 7.2855  | 0.0425  | 0.0395  | 16.7375 | 3.7685 | 0.0695 | 0.034     | 0.128  | 9.89    | 0.0525 | 0.0605 |
| WBS-34C   | Tree Swallow Carcass | 0.0025 | 0.33   | 0.006  | 11.0385 | 0.0365  | 0.0665  | 14.156  | 4.675  | 0.0725 | 0.0445    | 0.131  | 11.2935 | 0.0705 | 0.087  |
| WBS-37C   | Tree Swallow Carcass | 0.005  | 0.022  | 0.0075 | 8.2865  | 0.026   | 0.044   | 16.969  | 3.9495 | 0.062  | 0.0245    | 0.128  | 9.931   | 0.0635 | 0.083  |
| WBS-38C   | Tree Swallow Carcass | 0.004  | 0.029  | 0.0085 | 8.202   | 0.0365  | 0.0525  | 14.5425 | 3.9665 | 0.067  | 0.032     | 0.1325 | 9.9615  | 0.0565 | 0.056  |
| WBS-41C   | Tree Swallow Carcass | 0.006  | 0.0185 | 0.0085 | 7.797   | 0.035   | 0.0465  | 14.426  | 4.1975 | 0.062  | 0.0305    | 0.1355 | 10.646  | 0.059  | 0.075  |
| WBS-49C   | Tree Swallow Carcass | 0.005  | 0.0145 | 0.007  | 7.689   | 0.037   | 0.0995  | 17.0305 | 3.5535 | 0.065  | 0.0425    | 0.1155 | 10.709  | 0.064  | 0.0785 |

| Sample ID | Compartment               | 18:3n4 | 18:3n3 | 18:3n1 | 18:4n3 | 18:4n1 | 20:0   | 20:1n11 | 20:1n9 | 20:1n7 | 20:2n9 | 20:2n6 | 20:3n6 | 20:4n6 | 20:3n3 |
|-----------|---------------------------|--------|--------|--------|--------|--------|--------|---------|--------|--------|--------|--------|--------|--------|--------|
| HD01      | Aquatic Invertebrates     | 0.053  | 4.249  | 0.036  | 0.6235 | 0.1185 | 0.351  | 0.607   | 0.6675 | 0.131  | 0.031  | 0.629  | 0.297  | 3.496  | 0.2015 |
| HD02      | Aquatic Invertebrates     | 0.0425 | 5.82   | 0.039  | 0.777  | 0.1155 | 0.3715 | 0.52    | 0.6425 | 0.1355 | 0.001  | 0.5865 | 0.2765 | 3.6595 | 0.261  |
| HD03      | Aquatic Invertebrates     | 0.0565 | 5.646  | 0.0455 | 0.803  | 0.116  | 0.3735 | 0.6965  | 0.6305 | 0.1335 | 0.001  | 0.7725 | 0.3065 | 4.43   | 0.265  |
| HD04      | Aquatic Invertebrates     | 0.0605 | 5.8805 | 0.0555 | 0.8265 | 0.1125 | 0.415  | 0.5695  | 0.636  | 0.1145 | <MLOQ  | 0.615  | 0.287  | 3.868  | 0.2595 |
| HD05      | Aquatic Invertebrates     | 0.049  | 6.2135 | 0.069  | 0.8505 | 0.1035 | 0.3765 | 0.5105  | 0.6275 | 0.115  | <MLOQ  | 0.557  | 0.275  | 3.6845 | 0.272  |
| TR01      | Terrestrial Invertebrates | 0.087  | 11.187 | 0.003  | 0.1555 | 0.055  | 0.435  | 0.0205  | 0.1685 | 0.134  | 0.1945 | 0.1945 | 0.056  | 0.5675 | 0.118  |
| TR02      | Terrestrial Invertebrates | 0.061  | 11.658 | <MLOQ  | 0.162  | 0.0605 | 0.41   | 0.026   | 0.1475 | 0.1875 | 0.187  | 0.187  | 0.0625 | 0.5695 | 0.0855 |
| TR03      | Terrestrial Invertebrates | 0.153  | 9.512  | <MLOQ  | 0.163  | 0.0515 | 0.4955 | 0.0175  | 0.1775 | 0.167  | 0.316  | 0.316  | 0.067  | 0.559  | 0.1045 |
| TR04      | Terrestrial Invertebrates | 0.128  | 10.657 | 0.009  | 0.152  | 0.051  | 0.394  | 0.018   | 0.166  | 0.174  | <MLOQ  | 0.164  | 0.052  | 0.605  | 0.106  |
| TR05      | Terrestrial Invertebrates | 0.143  | 7.846  | <MLOQ  | 0.132  | 0.061  | 0.354  | 0.019   | 0.129  | 0.228  | <MLOQ  | 0.206  | 0.053  | 0.619  | 0.039  |
| WBS-1L    | Tree Swallow Liver        | 0.15   | 0.886  | 0.01   | 0.037  | 0.069  | 0.101  | 0.023   | 0.186  | 0.01   | 0.042  | 0.188  | 1.203  | 9.386  | 0.1    |
| WBS-3L    | Tree Swallow Liver        | 0.236  | 0.812  | 0.02   | 0.053  | 0.326  | 0.146  | 0.036   | 0.2    | 0.028  | 0.122  | 0.195  | 0.979  | 6.798  | 0.371  |
| WBS-4L    | Tree Swallow Liver        | 0.135  | 1.06   | 0.033  | 0.054  | 0.079  | 0.052  | 0.082   | 0.485  | 0.126  | <MLOQ  | 0.248  | 1.316  | 9.383  | 0.144  |

| Sample ID | Compartment          | 18:3n4 | 18:3n3 | 18:3n1 | 18:4n3 | 18:4n1 | 20:0   | 20:1n11 | 20:1n9 | 20:1n7 | 20:2n9 | 20:2n6 | 20:3n6 | 20:4n6 | 20:3n3 |
|-----------|----------------------|--------|--------|--------|--------|--------|--------|---------|--------|--------|--------|--------|--------|--------|--------|
| WBS-7L    | Tree Swallow Liver   | 0.241  | 0.715  | 0.023  | 0.022  | 0.083  | 0.12   | 0.02    | 0.182  | 0.022  | 0.096  | 0.3    | 1.098  | 6.079  | 0.102  |
| WBS-12L   | Tree Swallow Liver   | 0.25   | 0.76   | 0.003  | 0.036  | 0.423  | 0.138  | 0.05    | 0.299  | 0.014  | 0.07   | 0.285  | 0.972  | 6.098  | 0.477  |
| WBS-13L   | Tree Swallow Liver   | 0.155  | 0.725  | 0.016  | 0.033  | 0.178  | 0.118  | 0.072   | 0.336  | 0.029  | 0.063  | 0.266  | 1.024  | 7.171  | 0.321  |
| WBS-24L   | Tree Swallow Liver   | 0.096  | 1.123  | 0.03   | 0.047  | 0.06   | 0.026  | 0.107   | 0.297  | 0.078  | <MLOQ  | 0.217  | 0.786  | 5.5    | 0.084  |
| WBS-29L   | Tree Swallow Liver   | 0.204  | 1.184  | 0.012  | 0.031  | 0.113  | 0.098  | 0.014   | 0.157  | 0.022  | 0.044  | 0.169  | 0.629  | 4.55   | 0.108  |
| WBS-32L   | Tree Swallow Liver   | 0.155  | 0.69   | 0.01   | 0.078  | 0.635  | 0.124  | 0.105   | 0.342  | 0.04   | 0.021  | 0.203  | 1.135  | 8.674  | 0.807  |
| WBS-37L   | Tree Swallow Liver   | 0.222  | 0.881  | 0.015  | 0.044  | 0.221  | 0.146  | 0.025   | 0.222  | 0.034  | 0.089  | 0.219  | 0.755  | 4.628  | 0.146  |
| WBS-41L   | Tree Swallow Liver   | 0.136  | 1.033  | 0.023  | 0.046  | 0.285  | 0.088  | 0.009   | 0.139  | 0.02   | 0.022  | 0.219  | 1.276  | 9.806  | 0.228  |
| WBS-49L   | Tree Swallow Liver   | 0.139  | 1.062  | 0.007  | 0.035  | 0.122  | 0.16   | 0.019   | 0.193  | 0.017  | 0.089  | 0.216  | 1.66   | 10.386 | 0.193  |
| WBS-1C    | Tree Swallow Carcass | 0.148  | 2.631  | 0.031  | 0.345  | 0.379  | 0.3225 | 0.031   | 0.24   | 0.029  | 0.013  | 0.0525 | 0.2255 | 1.1015 | 1.209  |
| WBS-3C    | Tree Swallow Carcass | 0.163  | 2.7005 | 0.033  | 0.317  | 0.1885 | 0.448  | 0.048   | 0.303  | 0.0535 | 0.013  | 0.0665 | 0.369  | 2.133  | 0.1265 |
| WBS-4C    | Tree Swallow Carcass | 0.1445 | 4.1395 | 0.021  | 0.319  | 0.0825 | 0.4615 | 0.0435  | 0.3085 | 0.0425 | 0.0135 | 0.056  | 0.283  | 1.593  | 0.0645 |
| WBS-7C    | Tree Swallow Carcass | 0.1465 | 2.4845 | 0.0375 | 0.315  | 0.0885 | 0.376  | 0.04    | 0.3705 | 0.0465 | 0.0275 | 0.0555 | 0.254  | 1.4505 | 0.0345 |
| WBS-12C   | Tree Swallow Carcass | 0.1435 | 3.0815 | 0.025  | 0.308  | 0.0945 | 0.3605 | 0.0435  | 0.3365 | 0.064  | 0.0275 | 0.0555 | 0.2635 | 1.5155 | 0.0395 |
| WBS-13C   | Tree Swallow Carcass | 0.139  | 2.8185 | 0.025  | 0.315  | 0.0795 | 0.5075 | 0.043   | 0.2465 | 0.0495 | 0.0105 | 0.065  | 0.265  | 1.4745 | 0.0385 |
| WBS-18C   | Tree Swallow Carcass | 0.1505 | 2.443  | 0.0425 | 0.3535 | 0.0765 | 0.448  | 0.065   | 0.342  | 0.0535 | 0.0405 | 0.052  | 0.3115 | 1.6615 | 0.0285 |
| WBS-24C   | Tree Swallow Carcass | 0.1495 | 3.342  | 0.0335 | 0.3695 | 0.0785 | 0.441  | 0.0665  | 0.58   | 0.054  | 0.0255 | 0.074  | 0.2805 | 1.777  | 0.041  |
| WBS-29C   | Tree Swallow Carcass | 0.158  | 2.878  | 0.037  | 0.3575 | 0.083  | 0.382  | 0.053   | 0.2795 | 0.0425 | 0.026  | 0.059  | 0.2495 | 1.5465 | 0.0365 |
| WBS-32C   | Tree Swallow Carcass | 0.1335 | 2.839  | 0.03   | 0.3175 | 0.101  | 0.374  | 0.0505  | 0.403  | 0.047  | 0.0255 | 0.0545 | 0.269  | 1.5465 | 0.035  |
| WBS-34C   | Tree Swallow Carcass | 0.1165 | 3.525  | 0.0215 | 0.2835 | 0.059  | 0.7295 | 0.0605  | 0.452  | 0.058  | 0.0495 | 0.0835 | 0.4515 | 2.8355 | 0.05   |
| WBS-37C   | Tree Swallow Carcass | 0.1915 | 2.7535 | 0.0615 | 0.377  | 0.072  | 0.4145 | 0.0535  | 0.239  | 0.0475 | 0.03   | 0.057  | 0.258  | 1.389  | 0.0345 |
| WBS-38C   | Tree Swallow Carcass | 0.134  | 3.3775 | 0.032  | 0.368  | 0.082  | 0.36   | 0.0385  | 0.308  | 0.0455 | 0.0205 | 0.0515 | 0.2495 | 1.5265 | 0.0385 |
| WBS-41C   | Tree Swallow Carcass | 0.1535 | 3.055  | 0.04   | 0.388  | 0.0735 | 0.4105 | 0.042   | 0.2815 | 0.058  | 0.031  | 0.0595 | 0.24   | 1.4225 | 0.032  |
| WBS-49C   | Tree Swallow Carcass | 0.1445 | 3.601  | 0.0215 | 0.2905 | 0.0835 | 0.5735 | 0.0445  | 0.3355 | 0.0475 | 0.0175 | 0.0595 | 0.3225 | 1.624  | 0.04   |

| Sample ID | Compartment               | 20:4n3 | 20:5n3 | 22:1n11 | 22:1n9 | 22:1n7 | 22:2n6 | 21:5n3 | 22:4n6 | 22:5n6 | 22:4n3  | 22:5n3 | 22:6n3 | 24:1n9 |
|-----------|---------------------------|--------|--------|---------|--------|--------|--------|--------|--------|--------|---------|--------|--------|--------|
| HD01      | Aquatic Invertebrates     | 0.191  | 6.674  | 0.057   | 0.1065 | 0.0285 | 0.0265 | 0.084  | 0.247  | 0.1725 | 0.0105  | 0.362  | 0.8925 | 0.009  |
| HD02      | Aquatic Invertebrates     | 0.195  | 7.483  | 0.0555  | 0.1305 | 0.02   | 0.019  | 0.1125 | 0.2285 | 0.1595 | #DIV/0! | 0.3745 | 1.0125 | 0.017  |
| HD03      | Aquatic Invertebrates     | 0.194  | 7.7825 | 0.2275  | 0.123  | 0.0285 | 0.0215 | 0.0835 | 0.2755 | 0.1805 | 0.0115  | 0.4245 | 0.9835 | 0.018  |
| HD04      | Aquatic Invertebrates     | 0.195  | 7.6315 | 0.0545  | 0.123  | 0.0235 | 0.013  | 0.0825 | 0.247  | 0.148  | 0.016   | 0.3815 | 1.0035 | 0.021  |
| HD05      | Aquatic Invertebrates     | 0.1985 | 7.565  | 0.0635  | 0.1235 | 0.024  | 0.0155 | 0.072  | 0.2235 | 0.1685 | 0.009   | 0.3625 | 0.9885 | 0.014  |
| TR01      | Terrestrial Invertebrates | 0.045  | 1.448  | 0.0065  | 0.03   | 0.005  | 0.017  | 0.029  | 0.0215 | 0.0615 | <MLOQ   | <MLOQ  | 0.1005 | <MLOQ  |
| TR02      | Terrestrial Invertebrates | 0.0445 | 1.4785 | 0.0415  | 0.042  | 0.015  | 0.0345 | 0.0365 | 0.019  | 0.0155 | <MLOQ   | <MLOQ  | 0.078  | <MLOQ  |
| TR03      | Terrestrial Invertebrates | 0.0385 | 1.327  | 0.051   | 0.049  | <MLOQ  | 0.0965 | 0.0595 | 0.017  | 0.0175 | <MLOQ   | <MLOQ  | 0.096  | <MLOQ  |
| TR04      | Terrestrial Invertebrates | 0.032  | 1.557  | 0.042   | 0.047  | <MLOQ  | 0.022  | 0.051  | 0.021  | 0.021  | <MLOQ   | <MLOQ  | 0.086  | <MLOQ  |
| TR05      | Terrestrial Invertebrates | 0.024  | 1.225  | 0.025   | 0.021  | <MLOQ  | 0.033  | 0.033  | <MLOQ  | 0.015  | <MLOQ   | <MLOQ  | 0.083  | <MLOQ  |
| WBS-1L    | Tree Swallow Liver        | 0.13   | 3.363  | 0.01    | 0.036  | 0.018  | <MLOQ  | 0.022  | 0.47   | 0.107  | 0.012   | 3.91   | 7.303  | 0.014  |
| WBS-3L    | Tree Swallow Liver        | 0.037  | 0.021  | 0.04    | 0.028  | 0.07   | 0.023  | 0.025  | 0.536  | 0.128  | 0.032   | 3.95   | 5.451  | 0.019  |
| WBS-4L    | Tree Swallow Liver        | 0.144  | 4.246  | 0.866   | <MLOQ  | 0.034  | 0.027  | 0.047  | 0.417  | 0.13   | 0.019   | 4.982  | 9.264  | <MLOQ  |
| WBS-7L    | Tree Swallow Liver        | 0.145  | 3.266  | 0.014   | 0.035  | 0.046  | 0.025  | 0.031  | 0.446  | 0.08   | 0.028   | 5.451  | 6.322  | 0.016  |
| WBS-12L   | Tree Swallow Liver        | 0.17   | 3.677  | 0.072   | 0.063  | 0.044  | <MLOQ  | 0.016  | 0.398  | 0.07   | 0.015   | 4.457  | 6.173  | 0.017  |
| WBS-13L   | Tree Swallow Liver        | 0.13   | 4.191  | 0.184   | 0.084  | 0.043  | <MLOQ  | 0.03   | 0.493  | 0.132  | 0.019   | 5.393  | 8.603  | 0.015  |
| WBS-24L   | Tree Swallow Liver        | 0.112  | 2.037  | 0.317   | <MLOQ  | 0.029  | 0.019  | 0.054  | 0.458  | 0.144  | 0.022   | 4.605  | 6.284  | 0.094  |
| WBS-29L   | Tree Swallow Liver        | 0.108  | 2.266  | 0.003   | 0.018  | 0.027  | 0.006  | 0.02   | 0.362  | 0.067  | 0.021   | 5.029  | 4.735  | 0.017  |
| WBS-32L   | Tree Swallow Liver        | 0.192  | 8.314  | 0.232   | 0.11   | 0.022  | 0.014  | 0.006  | 0.452  | 0.081  | <MLOQ   | 4.289  | 8.081  | <MLOQ  |
| WBS-37L   | Tree Swallow Liver        | 0.159  | 2.902  | <MLOQ   | 0.033  | 0.047  | <MLOQ  | 0.017  | 0.377  | 0.078  | 0.025   | 4.077  | 4.882  | 0.011  |
| WBS-41L   | Tree Swallow Liver        | 0.145  | 4.764  | 0.004   | 0.037  | 0.025  | <MLOQ  | 0.027  | 0.466  | 0.095  | 0.01    | 4.549  | 8.433  | 0.011  |
| WBS-49L   | Tree Swallow Liver        | 0.076  | 4      | <MLOQ   | 0.085  | 0.049  | 0.121  | 0.012  | 0.499  | 0.125  | 0.017   | 4.642  | 6.937  | 0.03   |
| WBS-1C    | Tree Swallow Carcass      | 0.15   | 7.685  | 0.004   | 0.027  | 0.008  | 0.0635 | 0.112  | 0.106  | 0.007  | 0.011   | 0.9545 | 0.597  | <MLOQ  |
| WBS-3C    | Tree Swallow Carcass      | 0.0785 | 2.8095 | 0.004   | 0.0455 | 0.018  | 0.04   | 0.235  | 0.2855 | 0.0245 | <MLOQ   | 1.4095 | 1.007  | <MLOQ  |
| WBS-4C    | Tree Swallow Carcass      | 0.0935 | 2.758  | 0.004   | 0.0385 | 0.0075 | 0.011  | 0.14   | 0.1545 | 0.011  | <MLOQ   | 1.1675 | 0.8395 | <MLOQ  |
| WBS-7C    | Tree Swallow Carcass      | 0.083  | 2.4895 | <MLOQ   | 0.051  | 0.011  | 0.026  | 0.113  | 0.158  | 0.0125 | <MLOQ   | 1.2585 | 0.7865 | <MLOQ  |

| Sample ID | Compartment          | 20:4n3 | 20:5n3 | 22:1n11 | 22:1n9 | 22:1n7 | 22:2n6  | 21:5n3 | 22:4n6 | 22:5n6 | 22:4n3 | 22:5n3 | 22:6n3 | 24:1n9 |
|-----------|----------------------|--------|--------|---------|--------|--------|---------|--------|--------|--------|--------|--------|--------|--------|
| WBS-12C   | Tree Swallow Carcass | 0.0815 | 2.005  | <MLOQ   | 0.0445 | 0.009  | 0.0165  | 0.1515 | 0.1875 | 0.008  | <MLOQ  | 1.111  | 0.747  | <MLOQ  |
| WBS-13C   | Tree Swallow Carcass | 0.1345 | 3.262  | 0.067   | 0.0385 | 0.0115 | #DIV/0! | 0.156  | 0.1535 | 0.007  | <MLOQ  | 1.425  | 0.917  | <MLOQ  |
| WBS-18C   | Tree Swallow Carcass | 0.135  | 3.0155 | 0.172   | 0.047  | 0.008  | 0.012   | 0.0895 | 0.1785 | 0.012  | <MLOQ  | 1.324  | 1.0365 | <MLOQ  |
| WBS-24C   | Tree Swallow Carcass | 0.1375 | 3.2175 | 0.191   | 0.0695 | 0.0135 | 0.0175  | 0.05   | 0.202  | 0.0245 | <MLOQ  | 1.496  | 1.0855 | <MLOQ  |
| WBS-29C   | Tree Swallow Carcass | 0.133  | 2.827  | 0.0785  | 0.036  | 0.011  | 0.0095  | 0.061  | 0.172  | 0.019  | <MLOQ  | 1.378  | 0.9025 | <MLOQ  |
| WBS-32C   | Tree Swallow Carcass | 0.1245 | 2.4215 | 0.1     | 0.0505 | 0.0095 | 0.019   | 0.0685 | 0.1685 | 0.018  | <MLOQ  | 1.324  | 0.929  | <MLOQ  |
| WBS-34C   | Tree Swallow Carcass | 0.154  | 2.6145 | 0.0305  | 0.0595 | 0.0155 | 0.02    | 0.095  | 0.3535 | 0.0385 | 0.049  | 1.8015 | 1.2095 | <MLOQ  |
| WBS-37C   | Tree Swallow Carcass | 0.129  | 2.275  | 0.011   | 0.028  | 0.012  | 0.017   | 0.199  | 0.192  | 0.007  | <MLOQ  | 1.034  | 0.8305 | <MLOQ  |
| WBS-38C   | Tree Swallow Carcass | 0.1375 | 2.5795 | 0.004   | 0.0365 | 0.0095 | 0.018   | 0.1905 | 0.1635 | 0.021  | <MLOQ  | 1.256  | 0.7945 | <MLOQ  |
| WBS-41C   | Tree Swallow Carcass | 0.1295 | 2.659  | 0.014   | 0.034  | 0.0115 | <MLOQ   | 0.174  | 0.161  | 0.01   | <MLOQ  | 1.1205 | 0.701  | <MLOQ  |
| WBS-49C   | Tree Swallow Carcass | 0.1655 | 2.271  | <MLOQ   | 0.044  | 0.015  | <MLOQ   | 0.1485 | 0.1605 | 0.0115 | <MLOQ  | 1.129  | 0.786  | <MLOQ  |

**Table S12** - Concentrations (ng/g in air, ng/mL in surface water and rinsate, ng/g dw in sediment, and ng/g ww in biota samples) of 46 per- and polyfluoroalkyl substances identified in passive air, surface water, sediment, aquatic invertebrates, terrestrial invertebrates, and tree swallow GI-Tracts and livers collected from an aquatic-terrestrial food web.

Data on PFAS concentrations in the gastrointestinal tract contents generated during this study are available as a USGS data release<sup>9</sup>.

| Sample ID | Compartment           | PFBA | PFPeA | PFHxA | PFHpA | PFOA  | PFNA  | PFDA  | PFUnA | PFDoA | PFTTrDA | PFTeDA |
|-----------|-----------------------|------|-------|-------|-------|-------|-------|-------|-------|-------|---------|--------|
| WBS-1-1   | Tree Swallow Liver    | ND   | ND    | ND    | ND    | ND    | 1.54  | 2.63  | 0.93  | ND    | ND      | ND     |
| WBS-3-1   | Tree Swallow Liver    | ND   | ND    | ND    | ND    | ND    | 0.98  | 1.78  | 0.86  | ND    | ND      | ND     |
| WBS-4-1   | Tree Swallow Liver    | ND   | ND    | ND    | ND    | ND    | 1.34  | 2.62  | 0.725 | ND    | ND      | ND     |
| WBS-7-1   | Tree Swallow Liver    | ND   | ND    | ND    | ND    | ND    | 1.37  | 2.44  | 0.871 | ND    | ND      | ND     |
| WBS-12-1  | Tree Swallow Liver    | ND   | ND    | ND    | ND    | ND    | 1.06  | 2.3   | 0.822 | ND    | ND      | ND     |
| WBS-13-1  | Tree Swallow Liver    | ND   | ND    | ND    | ND    | ND    | 2.08  | 4.09  | 1.23  | ND    | ND      | ND     |
| WBS-18-1  | Tree Swallow Liver    | ND   | ND    | ND    | ND    | ND    | 1.43  | 3.1   | 0.85  | ND    | ND      | ND     |
| WBS-24-1  | Tree Swallow Liver    | 2.3  | ND    | ND    | ND    | ND    | 1.12  | 2.9   | 0.884 | ND    | ND      | ND     |
| WBS-29-1  | Tree Swallow Liver    | 2.31 | ND    | ND    | ND    | ND    | 1.49  | 3.44  | 0.998 | ND    | ND      | ND     |
| WBS-32-1  | Tree Swallow Liver    | ND   | ND    | ND    | ND    | ND    | 1.41  | 2.97  | 1.01  | ND    | ND      | ND     |
| WBS-34-1  | Tree Swallow Liver    | 2.26 | ND    | ND    | ND    | ND    | 1.04  | 2.09  | 0.75  | ND    | ND      | ND     |
| WBS-37-1  | Tree Swallow Liver    | 2.3  | ND    | ND    | ND    | ND    | 1.02  | 1.99  | 0.715 | ND    | ND      | ND     |
| WBS-38-1  | Tree Swallow Liver    | ND   | ND    | ND    | ND    | ND    | 1.28  | 3.05  | 0.847 | ND    | ND      | ND     |
| WBS-41-1  | Tree Swallow Liver    | ND   | ND    | ND    | ND    | ND    | 1.19  | 2.64  | 0.817 | 0.524 | 0.51    | ND     |
| WBS-49-1  | Tree Swallow Liver    | ND   | ND    | ND    | ND    | ND    | 1.33  | 2.45  | 0.783 | ND    | ND      | ND     |
| WBS-1-1   | Tree Swallow GI-Tract | ND   | ND    | ND    | ND    | ND    | 0.39  | 0.971 | 0.367 | 0.168 | 0.146   | 0.165  |
| WBS-3-1   | Tree Swallow GI-Tract | ND   | ND    | ND    | ND    | 0.153 | 0.259 | 0.441 | 0.245 | 0.143 | 0.152   | 0.126  |
| WBS-4-1   | Tree Swallow GI-Tract | ND   | 0.209 | ND    | ND    | ND    | 0.366 | 0.952 | 0.329 | 0.163 | 0.145   | 0.153  |
| WBS-7-1   | Tree Swallow GI-Tract | ND   | ND    | ND    | ND    | 0.11  | 0.422 | 0.858 | 0.393 | 0.25  | 0.174   | 0.208  |
| WBS-12-1  | Tree Swallow GI-Tract | ND   | ND    | ND    | ND    | 0.122 | 0.269 | 0.711 | 0.281 | 0.14  | 0.156   | 0.162  |
| WBS-13-1  | Tree Swallow GI-Tract | ND   | ND    | ND    | ND    | 0.13  | 0.609 | 1.35  | 0.49  | 0.204 | 0.176   | 0.163  |

| Sample ID | Compartment               | PFBA   | PFPeA  | PFHxA  | PFHpA   | PFOA    | PFNA     | PFDA     | PFUnA | PFDoA    | PFTTrDA | PFTeDA   |
|-----------|---------------------------|--------|--------|--------|---------|---------|----------|----------|-------|----------|---------|----------|
| WBS-18-1  | Tree Swallow GI-Tract     | ND     | ND     | ND     | ND      | ND      | 0.356    | 0.847    | 0.381 | 0.195    | 0.148   | 0.147    |
| WBS-24-1  | Tree Swallow GI-Tract     | ND     | ND     | ND     | ND      | 0.103   | 0.284    | 0.646    | 0.284 | 0.179    | 0.168   | 0.145    |
| WBS-32-1  | Tree Swallow GI-Tract     | ND     | ND     | ND     | ND      | 0.117   | 0.42     | 0.956    | 0.435 | 0.176    | 0.185   | 0.21     |
| WBS-34-1  | Tree Swallow GI-Tract     | ND     | ND     | ND     | ND      | ND      | 0.12     | 0.502    | 0.261 | 0.17     | 0.177   | 0.143    |
| WBS-37-1  | Tree Swallow GI-Tract     | ND     | ND     | ND     | ND      | ND      | 0.308    | 0.643    | 0.34  | 0.234    | 0.204   | 0.236    |
| WBS-38-1  | Tree Swallow GI-Tract     | ND     | ND     | ND     | ND      | ND      | 0.371    | 0.988    | 0.368 | 0.179    | 0.142   | 0.137    |
| WBS-41-1  | Tree Swallow GI-Tract     | ND     | ND     | ND     | ND      | ND      | 0.363    | 0.864    | 0.387 | 0.367    | 0.239   | 0.319    |
| WBS-49-1  | Tree Swallow GI-Tract     | ND     | ND     | ND     | ND      | ND      | 0.338    | 0.729    | 0.315 | 0.16     | 0.147   | 0.17     |
| WBS-S01   | Sediment                  | ND     | ND     | 0.656  | ND      | 0.378   | ND       | 0.529    | ND    | 0.902    | 0.383   | 0.436    |
| WBS-S02   | Sediment                  | ND     | ND     | 0.951  | ND      | 0.135   | ND       | 0.316    | ND    | 0.408    | 0.288   | 0.316    |
| WBS-S03   | Sediment                  | ND     | ND     | 0.357  | ND      | 0.134   | ND       | 0.209    | 0.139 | 0.313    | 0.144   | 0.252    |
| WBS-S04   | Sediment                  | ND     | ND     | 0.223  | ND      | 0.105   | ND       | 0.125    | 0.086 | 0.211    | 0.102   | 0.134    |
| WBS-S05   | Sediment                  | ND     | ND     | 1.59   | ND      | 0.529   | ND       | 0.764    | ND    | 1.02     | 0.49    | 0.775    |
| WBS-S06   | Sediment                  | ND     | ND     | 1.71   | ND      | 0.19    | ND       | 0.706    | ND    | 1.02     | 0.23    | 0.905    |
| WBS-W01   | Water                     | 0.0126 | 0.0139 | 0.0163 | 0.00374 | 0.00621 | 0.000976 | 0.00132  | ND    | ND       | ND      | ND       |
| WBS-W02   | Water                     | 0.0118 | 0.0136 | 0.016  | 0.00417 | 0.00638 | 0.00114  | 0.00101  | ND    | ND       | ND      | ND       |
| WBS-W03   | Water                     | 0.012  | 0.014  | 0.0177 | 0.00379 | 0.00571 | 0.000987 | 0.00142  | ND    | ND       | ND      | ND       |
| WBS-W04   | Water                     | 0.0123 | 0.0147 | 0.0194 | 0.00332 | 0.00519 | 0.00106  | 0.00116  | ND    | ND       | ND      | ND       |
| WBS-W05   | Water                     | 0.0118 | 0.0145 | 0.0178 | 0.00413 | 0.00605 | 0.001    | 0.000933 | ND    | ND       | ND      | ND       |
| WBS-W06   | Water                     | 0.0123 | 0.0139 | 0.0181 | 0.00332 | 0.00632 | 0.00112  | 0.00164  | ND    | ND       | ND      | ND       |
| WBS-R01   | Rinsate Water             | 0.0193 | 0.0163 | 0.019  | 0.00431 | 0.00778 | 0.00198  | 0.00219  | ND    | 0.000515 | ND      | ND       |
| WBS-R02   | Rinsate Water             | 0.0135 | 0.0145 | 0.0163 | 0.00469 | 0.0067  | 0.0015   | 0.00177  | ND    | 0.00064  | ND      | 0.000498 |
| WBS-T01   | Terrestrial Invertebrates | ND     | ND     | ND     | ND      | ND      | ND       | ND       | ND    | ND       | ND      | ND       |
| WBS-T02   | Terrestrial Invertebrates | ND     | ND     | ND     | ND      | ND      | ND       | ND       | ND    | ND       | ND      | ND       |
| WBS-T03   | Terrestrial Invertebrates | ND     | ND     | ND     | ND      | ND      | ND       | ND       | ND    | ND       | ND      | ND       |
| WBS-T04   | Terrestrial Invertebrates | ND     | ND     | ND     | ND      | ND      | ND       | ND       | ND    | ND       | ND      | ND       |

| Sample ID | Compartment               | PFBA       | PFPeA | PFHxA      | PFHpA      | PFOA       | PFNA      | PFDA       | PFUnA | PFDoA | PFTTrDA    | PFTeDA |
|-----------|---------------------------|------------|-------|------------|------------|------------|-----------|------------|-------|-------|------------|--------|
| WBS-T05   | Terrestrial Invertebrates | ND         | ND    | ND         | ND         | ND         | ND        | ND         | ND    | ND    | ND         | ND     |
| WBS-HD01  | Aquatic Invertebrates     | ND         | 0.194 | 0.271      | ND         | 0.101      | ND        | ND         | ND    | 0.374 | 0.248      | 0.423  |
| WBS-HD02  | Aquatic Invertebrates     | ND         | ND    | 0.221      | ND         | 0.114      | ND        | 0.1        | ND    | 0.44  | 0.259      | 0.25   |
| WBS-HD03  | Aquatic Invertebrates     | ND         | 0.202 | 0.157      | ND         | 0.088      | ND        | ND         | ND    | 0.37  | 0.22       | 0.201  |
| WBS-HD04  | Aquatic Invertebrates     | ND         | 0.218 | 0.157      | ND         | 0.1        | ND        | 0.101      | ND    | 0.455 | 0.251      | 0.242  |
| WBS-HD05  | Aquatic Invertebrates     | ND         | ND    | 0.361      | ND         | 0.0855     | ND        | 0.101      | ND    | 0.35  | 0.222      | 0.237  |
| WBS-SIP1  | Air                       | 0.04095966 | ND    | 0.03092762 | 1.810E-06  | 0.00595972 | 0.0011394 | 0.00181754 | ND    | ND    | 0.00213614 | ND     |
| WBS-SIP2  | Air                       | 0.04610344 | ND    | 0.01833761 | 0.00109478 | 0.00529753 | 8.486E-06 | 0.00242338 | ND    | ND    | 0.00160211 | ND     |
| WBS-SIP3  | Air                       | 0.04210273 | ND    | 0.006295   | 0.00218957 | 0.00463534 | 0.0011394 | 0.00181754 | ND    | ND    | 0.00213614 | ND     |
| WBS-SIP4  | Air                       | 0.08439596 | ND    | 0.08074024 | 0.00437913 | 0.00993287 | 0.0017091 | 0.00363508 | ND    | ND    | 0.00160211 | ND     |
| WBS-SIP5  | Air                       | 0.06496393 | ND    | 0.01176892 | 0.00164217 | 0.00860849 | 0.0011394 | 0.00242338 | ND    | ND    | 0.00160211 | ND     |

| Sample ID | Compartment        | PFBS | PFPeS | PFHxS | PFHpS | PFOS  | PFNS | PFDS | 4:2 FTS | 6:2 FTS | 8:2 FTS | 10:2 FTS |
|-----------|--------------------|------|-------|-------|-------|-------|------|------|---------|---------|---------|----------|
| WBS-1-1   | Tree Swallow Liver | ND   | ND    | ND    | ND    | 28.90 | ND   | ND   | ND      | ND      | ND      | NM       |
| WBS-3-1   | Tree Swallow Liver | ND   | ND    | ND    | ND    | 26.50 | ND   | ND   | ND      | ND      | ND      | NM       |
| WBS-4-1   | Tree Swallow Liver | ND   | ND    | ND    | ND    | 29.20 | ND   | ND   | ND      | ND      | ND      | NM       |
| WBS-7-1   | Tree Swallow Liver | ND   | ND    | ND    | ND    | 23.40 | ND   | ND   | ND      | ND      | ND      | NM       |
| WBS-12-1  | Tree Swallow Liver | ND   | ND    | ND    | ND    | 23.90 | ND   | ND   | ND      | ND      | ND      | NM       |
| WBS-13-1  | Tree Swallow Liver | ND   | ND    | ND    | ND    | 49.10 | ND   | ND   | ND      | ND      | ND      | NM       |
| WBS-18-1  | Tree Swallow Liver | ND   | ND    | ND    | ND    | 30.10 | ND   | ND   | ND      | ND      | ND      | NM       |
| WBS-24-1  | Tree Swallow Liver | ND   | ND    | ND    | ND    | 29.30 | ND   | ND   | ND      | ND      | ND      | NM       |
| WBS-29-1  | Tree Swallow Liver | ND   | ND    | ND    | ND    | 32.70 | ND   | ND   | ND      | ND      | ND      | NM       |
| WBS-32-1  | Tree Swallow Liver | ND   | ND    | ND    | ND    | 32.90 | ND   | ND   | ND      | ND      | ND      | NM       |
| WBS-34-1  | Tree Swallow Liver | ND   | ND    | ND    | ND    | 21.80 | ND   | 0.62 | ND      | ND      | ND      | NM       |
| WBS-37-1  | Tree Swallow Liver | ND   | ND    | ND    | ND    | 23.00 | ND   | ND   | ND      | ND      | ND      | NM       |
| WBS-38-1  | Tree Swallow Liver | ND   | ND    | ND    | ND    | 29.20 | ND   | ND   | ND      | ND      | ND      | NM       |



| Sample ID | Compartment           | PFBS    | PFPeS    | PFHxS   | PFHpS | PFOS    | PFNS | PFDS | 4:2 FTS | 6:2 FTS | 8:2 FTS | 10:2 FTS |
|-----------|-----------------------|---------|----------|---------|-------|---------|------|------|---------|---------|---------|----------|
| WBS-41-1  | Tree Swallow Liver    | ND      | ND       | ND      | ND    | 27.10   | ND   | ND   | ND      | ND      | ND      | NM       |
| WBS-49-1  | Tree Swallow Liver    | ND      | ND       | ND      | ND    | 30.60   | ND   | ND   | ND      | ND      | ND      | NM       |
| WBS-1-1   | Tree Swallow GI-Tract | ND      | ND       | ND      | ND    | 10.60   | ND   | 0.16 | ND      | ND      | ND      | NM       |
| WBS-3-1   | Tree Swallow GI-Tract | ND      | ND       | ND      | ND    | 6.00    | ND   | 0.12 | ND      | ND      | ND      | NM       |
| WBS-4-1   | Tree Swallow GI-Tract | ND      | ND       | ND      | ND    | 10.30   | ND   | 0.17 | ND      | ND      | ND      | NM       |
| WBS-7-1   | Tree Swallow GI-Tract | ND      | ND       | ND      | ND    | 9.55    | ND   | 0.13 | ND      | ND      | ND      | NM       |
| WBS-12-1  | Tree Swallow GI-Tract | ND      | ND       | ND      | ND    | 8.03    | ND   | 0.16 | ND      | ND      | ND      | NM       |
| WBS-13-1  | Tree Swallow GI-Tract | ND      | ND       | ND      | ND    | 14.90   | ND   | 0.14 | ND      | ND      | ND      | NM       |
| WBS-18-1  | Tree Swallow GI-Tract | ND      | ND       | ND      | ND    | 10.20   | ND   | 0.20 | ND      | ND      | ND      | NM       |
| WBS-24-1  | Tree Swallow GI-Tract | ND      | ND       | ND      | 0.12  | 8.15    | ND   | 0.19 | ND      | ND      | ND      | NM       |
| WBS-32-1  | Tree Swallow GI-Tract | ND      | ND       | ND      | ND    | 11.70   | ND   | 0.16 | ND      | ND      | ND      | NM       |
| WBS-34-1  | Tree Swallow GI-Tract | ND      | ND       | ND      | ND    | 6.07    | ND   | 0.21 | ND      | ND      | ND      | NM       |
| WBS-37-1  | Tree Swallow GI-Tract | ND      | ND       | ND      | ND    | 8.51    | ND   | 0.19 | ND      | ND      | ND      | NM       |
| WBS-38-1  | Tree Swallow GI-Tract | ND      | ND       | ND      | ND    | 11.80   | ND   | 0.22 | ND      | ND      | ND      | NM       |
| WBS-41-1  | Tree Swallow GI-Tract | ND      | ND       | ND      | ND    | 9.85    | ND   | 0.17 | ND      | ND      | ND      | NM       |
| WBS-49-1  | Tree Swallow GI-Tract | ND      | ND       | ND      | 0.13  | 9.20    | ND   | 0.14 | ND      | ND      | ND      | NM       |
| WBS-S01   | Aquatic Sediment      | ND      | ND       | ND      | ND    | 1.74    | ND   | 0.42 | ND      | ND      | ND      | NM       |
| WBS-S02   | Aquatic Sediment      | ND      | ND       | ND      | ND    | 1.43    | ND   | 0.25 | ND      | ND      | ND      | NM       |
| WBS-S03   | Aquatic Sediment      | ND      | ND       | ND      | ND    | 1.14    | 0.13 | 0.56 | ND      | ND      | ND      | NM       |
| WBS-S04   | Aquatic Sediment      | ND      | ND       | ND      | ND    | 0.51    | 0.08 | 0.28 | ND      | ND      | ND      | NM       |
| WBS-S05   | Aquatic Sediment      | ND      | ND       | ND      | ND    | 2.70    | ND   | 0.76 | ND      | ND      | ND      | NM       |
| WBS-S06   | Aquatic Sediment      | ND      | ND       | ND      | ND    | 4.4     | ND   | 0.78 | ND      | ND      | ND      | NM       |
| WBS-W01   | Water                 | 0.00447 | 0.00047  | 0.00202 | ND    | 0.0059  | ND   | ND   | ND      | 0.00607 | ND      | NM       |
| WBS-W02   | Water                 | 0.00374 | 0.000449 | 0.00209 | ND    | 0.00599 | ND   | ND   | ND      | 0.00696 | ND      | NM       |
| WBS-W03   | Water                 | 0.00403 | 0.00     | 0.00236 | ND    | 0.00621 | ND   | ND   | ND      | 0.00574 | ND      | NM       |
| WBS-W04   | Water                 | 0.00381 | ND       | 0.00211 | ND    | 0.00566 | ND   | ND   | ND      | 0.00563 | ND      | NM       |

| Sample ID | Compartment               | PFBS       | PFPeS | PFHxS   | PFHpS | PFOS    | PFNS | PFDS   | 4:2 FTS | 6:2 FTS | 8:2 FTS    | 10:2 FTS   |
|-----------|---------------------------|------------|-------|---------|-------|---------|------|--------|---------|---------|------------|------------|
| WBS-W05   | Water                     | 0.00348    | 0.00  | 0.0023  | ND    | 0.0054  | ND   | ND     | ND      | 0.00609 | ND         | NM         |
| WBS-W06   | Water                     | 0.00406    | ND    | 0.00207 | ND    | 0.0067  | ND   | ND     | ND      | 0.00576 | ND         | NM         |
| WBS-R01   | Water                     | 0.00445    | ND    | 0.00229 | ND    | 0.34    | 0.00 | ND     | ND      | 0.00857 | ND         | NM         |
| WBS-R02   | Water                     | 0.00       | ND    | 0.00    | ND    | 0.03    | ND   | ND     | ND      | 0.01    | ND         | NM         |
| WBS-T01   | Terrestrial Invertebrates | ND         | ND    | ND      | ND    | 1.90    | ND   | ND     | ND      | 0.387   | ND         | NM         |
| WBS-T02   | Terrestrial Invertebrates | ND         | ND    | ND      | ND    | 1.91    | ND   | ND     | ND      | 0.32    | ND         | NM         |
| WBS-T03   | Terrestrial Invertebrates | ND         | ND    | ND      | ND    | 1.79    | ND   | ND     | ND      | 0.36    | ND         | NM         |
| WBS-T04   | Terrestrial Invertebrates | ND         | ND    | ND      | ND    | 1.97    | ND   | ND     | ND      | 0.36    | ND         | NM         |
| WBS-T05   | Terrestrial Invertebrates | ND         | ND    | ND      | ND    | 2.83    | ND   | ND     | ND      | 0.52    | ND         | NM         |
| WBS-HD01  | Aquatic Invertebrates     | ND         | ND    | ND      | ND    | 1.28    | ND   | 0.12   | ND      | ND      | ND         | NM         |
| WBS-HD02  | Aquatic Invertebrates     | ND         | ND    | ND      | ND    | 1.54    | ND   | 0.12   | ND      | ND      | ND         | NM         |
| WBS-HD03  | Aquatic Invertebrates     | ND         | ND    | ND      | ND    | 1.32    | ND   | 0.13   | ND      | ND      | ND         | NM         |
| WBS-HD04  | Aquatic Invertebrates     | ND         | ND    | ND      | ND    | 1.57    | ND   | 0.11   | ND      | 4.86    | ND         | NM         |
| WBS-HD05  | Aquatic Invertebrates     | ND         | ND    | ND      | ND    | 1.6000  | ND   | 0.1070 | ND      | ND      | ND         | NM         |
| WBS-SIP1  | Air                       | 0.0040     | NM    | 0.0007  | NM    | 0.0558  | NM   | ND     | NM      | 0.0000  | 0.0002     | 0.0000     |
| WBS-SIP2  | Air                       | 0.0040     | NM    | 0.0007  | NM    | 0.0467  | NM   | ND     | NM      | 0.0046  | 0.0003     | 0.0002     |
| WBS-SIP3  | Air                       | 0.0047     | NM    | 0.0014  | NM    | 0.0387  | NM   | ND     | NM      | 0.0025  | 0.0000     | 0.0000     |
| WBS-SIP4  | Air                       | 0.0047     | NM    | 0.0029  | NM    | 0.2564  | NM   | ND     | NM      | 0.0032  | 0.0000     | 0.0009     |
| WBS-SIP5  | Air                       | 0.00201364 | NM    | 0       | NM    | 0.08692 | NM   | ND     | NM      | 0.00309 | 2.0367E-05 | 5.9921E-05 |

1 **References**

- 2 1. Kielstra, B. W., Arnott, S. E., & Gunn, J. M. (2017). Subcatchment deltas and upland features  
3 influence multiscale aquatic ecosystem recovery in damaged landscapes. *Ecological*  
4 *Applications*, 27(8), 2249-2261.
- 5 2. Graves, S. D., Liber, K., Palace, V., Hecker, M., Doig, L. E., & Janz, D. M. (2019). Effects of  
6 selenium on benthic macroinvertebrates and fathead minnow (*Pimephales promelas*) in a  
7 boreal lake ecosystem. *Ecotoxicology and Environmental Safety*, 182, 109354.
- 8 3. Custer, C. M., Custer, T. W., Dummer, P. M., Schultz, S., Tseng, C. Y., Karouna-Renier, N.,  
9 & Matson, C. W. (2020). Legacy and contaminants of emerging concern in tree swallows  
10 along an agricultural to industrial gradient: Maumee River, Ohio. *Environmental*  
11 *Toxicology and Chemistry*, 39(10), 1936-1952.
- 12 4. Sun, J., Letcher, R. J., Eens, M., Covaci, A., & Fernie, K. J. (2020). Perfluoroalkyl acids and  
13 sulfonamides and dietary, biological and ecological associations in peregrine falcons  
14 from the Laurentian Great Lakes Basin, Canada. *Environmental Research*, 191, 110151.
- 15 5. Sherlock, C., Fernie, K. J., Munno, K., Provencher, J., & Rochman, C. (2022). The potential  
16 of aerial insectivores for monitoring microplastics in terrestrial environments. *Science of*  
17 *The Total Environment*, 807, 150453.
- 18 6. Hopkins, K. E., McKinney, M. A., Letcher, R. J., & Fernie, K. J. (2023). The influence of  
19 environmental and ecological factors on the accumulation and distribution of short-and  
20 long-chain perfluoroalkyl acids in a mid-trophic avian insectivore. *Environmental*  
21 *Pollution*, 121133.

- 22 7. Pedro, S., Fisk, A. T., Ferguson, S. H., Hussey, N. E., Kessel, S. T., & McKinney, M. A.  
23 (2020). Broad feeding niches of capelin and sand lance may overlap those of polar cod  
24 and other native fish in the eastern Canadian Arctic. *Polar Biology*, 43, 1707-1724.
- 25 8. Rauert, C., Shoieb, M., Schuster, J. K., Eng, A., & Harner, T. (2018). Atmospheric  
26 concentrations and trends of poly-and perfluoroalkyl substances (PFAS) and volatile  
27 methyl siloxanes (VMS) over 7 years of sampling in the Global Atmospheric Passive  
28 Sampling (GAPS) network. *Environmental Pollution*, 238, 94-102.
- 29 9. Karouna-Renier, N.K., Hopkins, K.E., Fernie, K.J. (2023). Per- and polyfluoroalkyl Substances  
30 in tree swallow gut contents. USGS Data Release doi :5066/P92J8EQ
